1 **Heterodimers of functionally divergent ARF-GEF paralogues**  
2 **prevented by self-interacting dimerisation domain**

3

4 Sabine Brumm<sup>1,2#</sup>, Manoj K. Singh<sup>1#</sup>, Hauke Beckmann<sup>1</sup>, Sandra Richter<sup>1</sup>, Kerstin Huhn<sup>1</sup>,  
5 Tim Kucera<sup>1</sup>, Sarah Baumann<sup>1</sup>, Choy Kriechbaum<sup>1</sup>, Hanno Wolters<sup>1</sup>, Shinobu Takada<sup>1,3</sup>,  
6 Gerd Jürgens<sup>1,\*</sup>

7

8

9 <sup>1</sup> Center for Plant Molecular Biology (ZMBP), Developmental Genetics, University of  
10 Tübingen, Auf der Morgenstelle 32, 72076 Tübingen, Germany

11

12 Current addresses:

13 <sup>2</sup> Sainsbury Laboratory, University of Cambridge, 47 Bateman Street, Cambridge CB2 1LR

14

15 <sup>3</sup> Laboratory of Plant Growth and Development, Department of Biology, Graduate School of  
16 Science and Faculty of Science, Osaka University, Toyonaka, Osaka 560-0043, Japan

17

18 # These authors contributed equally

19

20 \* Corresponding author (ORCID 0000-0003-4666-8308): [gerd.juergens@zmbp.uni-](mailto:gerd.juergens@zmbp.uni-tuebingen.de)  
21 [tuebingen.de](mailto:gerd.juergens@zmbp.uni-tuebingen.de)

22

23

24

## 25 **Abstract**

26

27 Functionally divergent paralogs of homomeric proteins do not form potentially deleterious  
28 heteromers, which requires distinction between self and non-self (Hochberg et al., 2018;  
29 Marchant et al, 2019; Marsh and Teichmann, 2015). In Arabidopsis, two ARF guanine-  
30 nucleotide exchange factors (ARF-GEFs) related to mammalian GBF1, named GNOM and  
31 GNL1, can mediate coatamer complex (COPI)-coated vesicle formation in retrograde Golgi-  
32 endoplasmic reticulum (ER) traffic (Geldner et al., 2003; Richter et al., 2007; Teh and Moore,  
33 2007). Unlike GNL1, however, GNOM is also required for polar recycling of endocytosed  
34 auxin efflux regulator PIN1 from endosomes to the plasma membrane. Here we show that  
35 these paralogues form homodimers constitutively but no heterodimers. We also address why  
36 and how GNOM and GNL1 might be kept separate. These paralogues share a common  
37 domain organisation and each N-terminal dimerisation (DCB) domain can interact with the  
38 complementary fragment ( $\Delta$ DCB) of its own and the other protein. However, unlike self-  
39 interacting DCB<sup>GNOM</sup> (Grebe et al., 2000; Anders et al., 2008), DCB<sup>GNL1</sup> did not interact with  
40 itself nor DCB<sup>GNOM</sup>. DCB<sup>GNOM</sup> removal or replacement with DCB<sup>GNL1</sup>, but not disruption of  
41 cysteine bridges that stabilise DCB-DCB interaction, resulted in GNOM-GNL1 heterodimers  
42 which impaired developmental processes such as lateral root formation. We propose  
43 precocious self-interaction of the DCB<sup>GNOM</sup> domain as a mechanism to preclude formation of  
44 fitness-reducing GNOM-GNL1 heterodimers.

45

46

## 47 **Introduction**

48

49 ARF guanine-nucleotide exchange factors (ARF-GEFs) promote the formation of transport  
50 vesicles on endomembranes by catalysing the GDP-GTP exchange of small ARF GTPases  
51 through their SEC7 domain (Mossessova et al., 2003; Renault et al., 2003; reviewed in  
52 Casanova, 2007; Anders and Jürgens, 2008). Plant genomes only encode large ARF-GEFs,

53 which are evolutionarily conserved among eukaryotes and have a distinct domain  
54 organisation (Cox et al., 2004; Mouratou et al., 2005; Anders and Jürgens, 2008; Bui et al.,  
55 2009; Pipaliya et al., 2019). The centrally located catalytic SEC7 domain is flanked by a  
56 Homology Upstream of SEC7 (HUS) domain and three or four Homology Downstream of  
57 SEC7 (HDS1-3 or HDS1-4) domains (Mouratou et al., 2005; Anders and Jürgens, 2008). In  
58 addition, there is an N-terminal dimerisation and cyclophilin-binding (DCB) domain which in  
59 several ARF-GEFs has been shown to interact with itself and at least one other domain of  
60 the same ARF-GEF (Grebe et al., 2000; Ramaen et al., 2007; Anders et al., 2008). In  
61 Arabidopsis, interactions involving the DCB domain are required for membrane association  
62 of ARF-GEF GNOM, functional complementation of mutant GNOM proteins and formation of  
63 functional GNOM dimers mediating coordinated activation of ARF1 GTPases (Anders et al.,  
64 2008; Brumm et al., 2020).

65  
66 In Arabidopsis, there are three paralogues related to human GBF1. Like GBF1, GNOM and  
67 GNOM-LIKE 1 (GNL1) each can mediate COPI traffic from the Golgi stacks to the ER  
68 whereas GNOM but not GNL1 is also required for polar recycling of auxin efflux carrier PIN1  
69 from endosomes to the basal plasma membrane (Steinmann et al., 1999; Geldner et al.,  
70 2003; Richter et al., 2007; Teh and Moore, 2007). The third paralogue GNL2 essentially  
71 behaves like GNOM but is specifically expressed and required in haploid pollen development  
72 (Richter et al., 2011). GNOM and GNL1 co-exist in virtually all tissues and yet only GNOM  
73 performs the task of polar recycling of PIN1. This is remarkable because GNOM and GNL1  
74 are closely related by sequence, with 60% of their respective 1451 and 1443 amino acid  
75 residues being identical. Their functional divergence suggests that GNOM and GNL1 are  
76 kept apart within the cell. Here we demonstrate that GNL1, like GNOM, forms homodimers  
77 but does not form heterodimers with GNOM which, when engineered, impair development  
78 and then address how GNOM and GNL1 might be kept separate.

79

80

81 **Results**

82

83 Co-immunoprecipitation revealed interaction of differently tagged GNL1 proteins in  
84 transgenic Arabidopsis seedling extract, much like that of GNOM (Fig. 1A,B). In contrast, no  
85 GNL1-GNOM heteromers were detected (Fig. 1B). ARF-GEFs are cytosolic and associate  
86 with endomembranes for activation of their ARF substrates (Steinmann et al., 1999; Anders  
87 et al., 2008). Cell fractionation followed by co-immunoprecipitation demonstrated that like  
88 GNOM (Brumm et al., 2020), GNL1 proteins exist as homomers both in the cytosol and on  
89 membranes, indicating that these proteins form homomers constitutively rather than only in  
90 the context of membrane association (Fig. 1C).

91

92 The domain organisation is identical between GNOM and GNL1. In GNOM, the N-terminal  
93 DCB domain interacts with the complementary  $\Delta$ DCB fragment to mediate membrane  
94 association (Anders et al., 2008; see Fig. 1D). Using the yeast two-hybrid assay, we also  
95 detected DCB- $\Delta$ DCB interaction in GNL1, which was very similar to that in GNOM (Fig. 1D-  
96 G). Moreover, each DCB domain interacted not only with the  $\Delta$ DCB fragment of its own  
97 protein but also with that of the paralogue (Fig. 1E). The two DCB domains also behaved  
98 identically in their interaction with truncated or mutated  $\Delta$ DCB fragments of GNOM (Fig. 1F-  
99 G). These results suggest that the two proteins have the potential to form GNOM-GNL1  
100 heteromers via DCB- $\Delta$ DCB interaction, which however, appears to be prevented by some  
101 unknown mechanism(s) and for unknown reason(s) in planta. Nonetheless, there was one  
102 specific difference between the two DCB domains. Only DCB<sup>GNOM</sup> interacted with itself  
103 whereas DCB<sup>GNL1</sup> did not interact with itself nor with DCB<sup>GNOM</sup> (Fig. 1H). Thus, although  
104 both GNOM and GNL1 form homomers, GNL1 homomerisation relies on DCB- $\Delta$ DCB  
105 interaction only whereas GNOM homomerisation can also be mediated by DCB-DCB  
106 interaction.

107

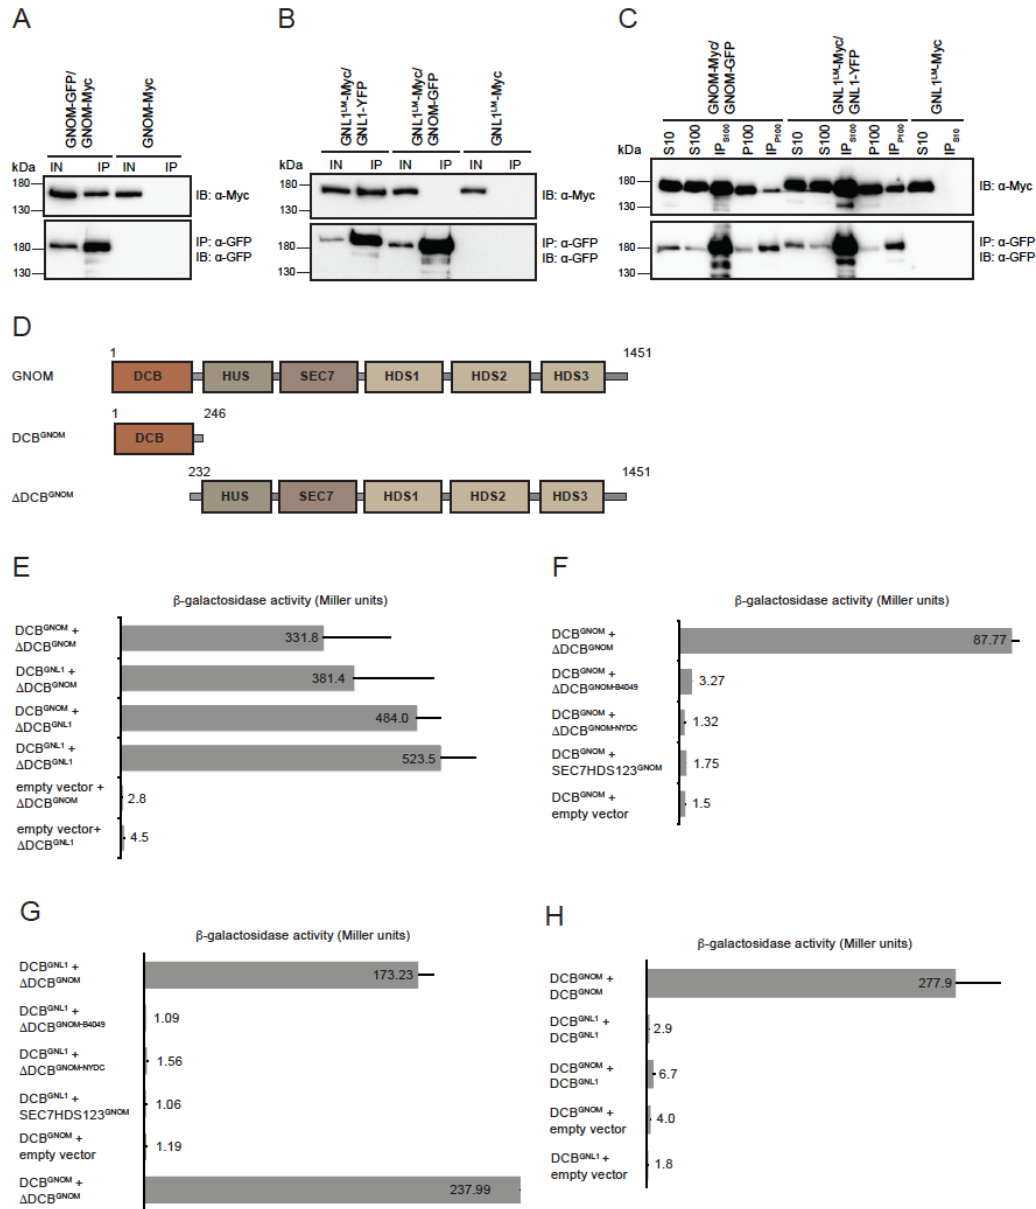

108

109 **Figure 1. Paralogous ARF-GEFs GNOM and GNL1 – no heteromer formation but domain**  
 110 **interaction**

111 **(A-C)** In-planta co-immunoprecipitation interaction assays of full-length proteins. IN, input; IP, immunoprecipitate. Proteins were separated by SDS-PAGE and probed with specific antisera (IB; right); protein sizes in kDa (left). **(A)** Interaction of GNOM-Myc with GNOM-HA. GNOM-Myc, negative control. **(B)** Interaction of GNL1<sup>LM</sup>-Myc with GNL1-YFP but no GNOM-GNL1 interaction. GNL1<sup>LM</sup>-Myc, negative control. GNL1<sup>LM</sup>, engineered BFA-sensitive variant of GNL1 (Richter et al., 2007). **(C)** Cell fractionation and co-IP of differently tagged GNL1 from Arabidopsis seedlings. S10, S100, P100, supernatants and pellet from centrifugation at 10,000 x g and 100,000 x g. GNOM-GFP x GNOM-Myc, positive control; GNL1<sup>LM</sup>-Myc, negative control.

119 **(D-H)** Quantitative yeast two-hybrid interaction assays of DCB domain. **(D)** Diagram of domain organisation of ARF-GEFs GNOM and GNL1. The DCB<sup>GNOM</sup> domain spans aa1-246, the complementary ΔDCB<sup>GNOM</sup> fragment (comprising domains HUS, SEC7, HDS1, HDS2 and HDS3) spans aa232-1451. **(E)** Both DCB<sup>GNOM</sup> and DCB<sup>GNL1</sup> interacted with ΔDCB<sup>GNL1</sup> and ΔDCB<sup>GNOM</sup>.

123 **(F, G)** Interaction of **(F)** DCB<sup>GNOM</sup> and **(G)** DCB<sup>GNL1</sup> with wild-type ΔDCB<sup>GNOM</sup>. Both DCB domains failed to interact with ΔDCB<sup>GNOM</sup> variants bearing HUS box (ΔDCB<sup>GNOM-NYDC</sup>) or G579R mutation (ΔDCB<sup>GNOM-B4049</sup>) or with a ΔDCB<sup>GNOM</sup> fragment lacking the HUS domain (SEC7HDS123<sup>GNOM</sup>).

126 **(H)** DCB<sup>GNL1</sup> did not interact with itself, unlike DCB<sup>GNOM</sup>, nor with DCB<sup>GNOM</sup>.

127  
128  
129  
130

**Figure 1 – figure supplement 1. DCB-DCB interaction assays of GNOM-GNL1 chimeric DCB domains**

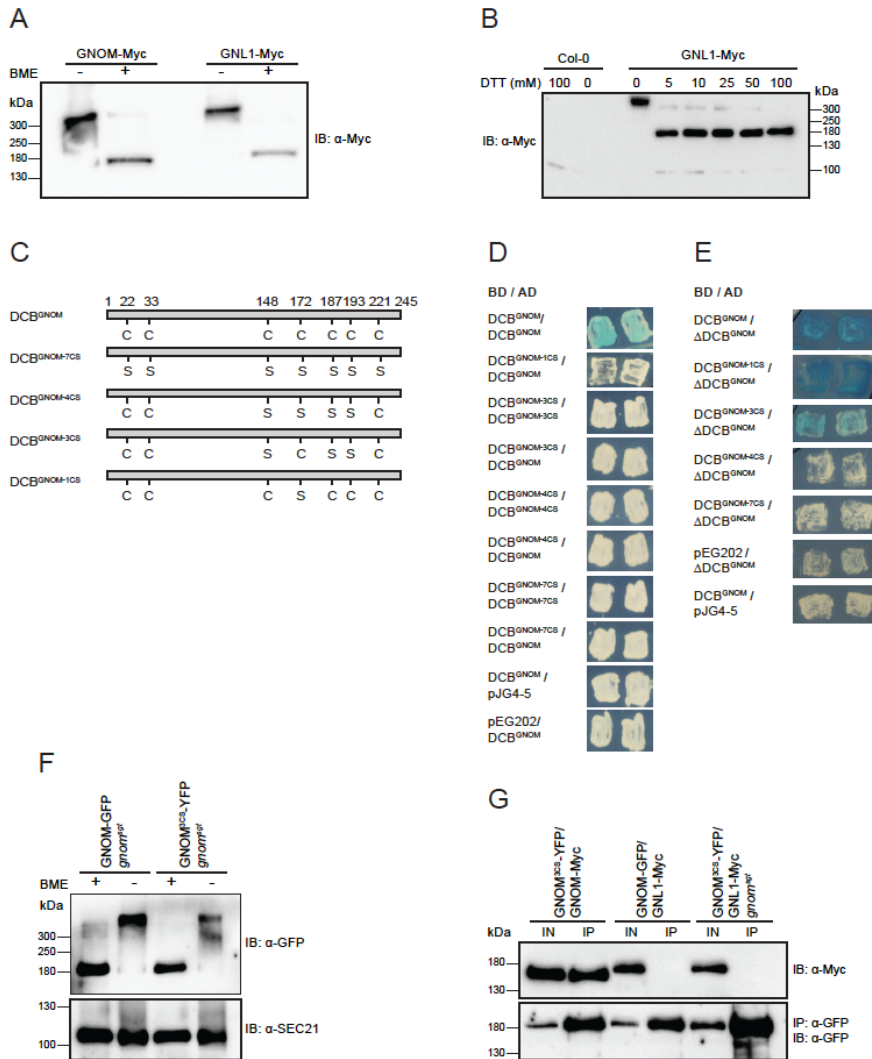

131

**Figure 2. Interaction behaviour and functionality of C-to-S substitution mutants**

(A-B) Redox-dependent GNOM and GNL1 dimer detection. (A) Apparent dimers of GNOM and GNL1 detected in Western blots under non-reducing conditions (BME, β-mercaptoethanol). (B) Band shift to monomer size in 5 mM or more dithiothreitol (DTT), suggesting involvement of cysteine bridges in stabilising the dimers.

(C-G) Interaction behaviour of GNOM with C-to-S substitutions (GNOM<sup>CS</sup>). (C) Positions of C residues and their C-to-S substitutions indicated in DCB domain of wild-type and 3CS, 4CS, 7CS and 1CS mutant GNOM proteins. (D-E) Yeast two-hybrid interaction assays. (D) None of the mutant DCB<sup>GNOM</sup> domains interacted with itself or with wild-type DCB<sup>GNOM</sup> domain. (E) DCB<sup>GNOM-3CS</sup> and DCB<sup>GNOM-1CS</sup> interacted with the ΔDCB<sup>GNOM</sup> fragment, like wild-type DCB<sup>GNOM</sup> and in contrast to the other two C>S substitution mutants. BD, DNA-binding domain; AD, activation domain. (F) GNOM<sup>3CS</sup> formed homodimers detectable under non-reducing conditions, although the dimer-representing bands appeared abnormal. (G) Co-immunoprecipitation analysis of GNOM<sup>3CS</sup>-YFP and GNL1-Myc from transgenic Arabidopsis seedling extract.

Figure 2 – figure supplement 1. Expression of transgenes in *gnom<sup>sgt</sup>* background

Figure 2 – figure supplement 2. Rescue of *gnom<sup>sgt</sup>* mutant plants with C-to-S substitution variants of GNOM

Figure 2 – figure supplement 3. Subcellular localisation of GNOM<sup>CS</sup> mutant proteins

Figure 2 – figure supplement 4. Interaction behaviour of GNOM<sup>4CS</sup>

132  
133  
134  
135  
136  
137  
138  
139  
140  
141  
142  
143  
144  
145  
146  
147  
148  
149  
150

151 **Figure 2 – figure supplement 5.** Complementation of *gnom<sup>sgt</sup> gnl1* double knockout mutant with  
152 GNOM<sup>3CS</sup>  
153

154 Gel electrophoresis under non-reducing conditions revealed a distinct higher band for  
155 both GNOM and GNL1, consistent with the occurrence of homodimers (Fig. 2A). Exposure  
156 to 5 mM or more dithiothreitol (DTT) shifted the GNL1 band to the monomer size, further  
157 supporting the idea that cysteine bridges might be involved in stabilising the dimers (Fig.  
158 2B). The DCB domain of GNOM has 7 cysteine residues (Fig. 2C). To assess their  
159 significance, we generated different sets of C-to-S substitutions, yielding GNOM<sup>7CS</sup>,  
160 GNOM<sup>4CS</sup>, GNOM<sup>3CS</sup> and GNOM<sup>1CS</sup>, and tested the mutant DCB<sup>GNOM</sup> variants in yeast two-  
161 hybrid experiments for their ability to interact with themselves, DCB<sup>GNOM</sup> and  $\Delta$ DCB<sup>GNOM</sup> (Fig.  
162 2C-E). All these mutant DCB<sup>GNOM</sup> variants failed to interact with themselves and with the  
163 wild-type form of DCB<sup>GNOM</sup> (Fig. 2D). Regarding the interaction with  $\Delta$ DCB<sup>GNOM</sup>, only  
164 DCB<sup>GNOM-3CS</sup> and the complementary substitution variant DCB<sup>GNOM-1CS</sup> interacted whereas  
165 the other variants DCB<sup>GNOM-4CS</sup> and DCB<sup>GNOM-7CS</sup> failed to do so (Fig. 2E). Thus, the C-to-S  
166 substitutions impaired the interaction capability of the DCB<sup>GNOM</sup> domain, with the DCB-DCB  
167 interaction apparently being more sensitive than the DCB- $\Delta$ DCB interaction. We then  
168 generated transgenic lines expressing full-length GNOM variants with C-to-S substitutions  
169 (Figure 2 – figure supplement 1).

170  
171 Unexpectedly, full-length GNOM<sup>4CS</sup> and GNOM<sup>7CS</sup> mutant proteins rescued Arabidopsis  
172 plants lacking the endogenous *GNOM* gene (Figure 2 – figure supplement 2). In addition,  
173 GNOM<sup>4CS</sup> associated with endosomal membranes in the absence of endogenous GNOM  
174 (Figure 2 – figure supplement 3), although there was no DCB<sup>GNOM-4CS</sup>- $\Delta$ DCB<sup>GNOM</sup> interaction  
175 as required for membrane association (Fig. 2E). GNOM<sup>4CS</sup> was also unable to interact with  
176 itself but did interact with GNOM and with GNOM<sup>3CS</sup>, indicating that the  $\Delta$ DCB fragment of  
177 GNOM<sup>4CS</sup> was able to interact with DCB domains other than its own (Figure 2 – figure  
178 supplement 4). In contrast, GNOM<sup>3CS</sup> was not only able to interact with GNOM<sup>4CS</sup> (Figure 2 –

179 figure supplement 4) but also appeared to be functional on its own since it rescued not only  
180 the lethal *gnom<sup>sgt</sup>* mutant, a 37-kb deletion of *GNOM* and flanking genes (Brumm et al.,  
181 2020), but also the gametophytically lethal *gnom<sup>sgt</sup> gnl1* double mutant lacking both  
182 paralogues (Figure 2 – figure supplement 2 and 5; Suppl. Table 1). However, the *gnom<sup>sgt</sup>*  
183 *gnl1* double mutant rescued by *GNOM<sup>3CS</sup>* showed a strong pollen transmission defect that  
184 revealed not only severe growth retardation but also impairment of both GNL1 and GNOM  
185 functions in pollen development (Suppl. Table 1). Interestingly, *GNOM<sup>3CS</sup>* formed  
186 homodimers detectable under non-reducing conditions, although the dimer-representing  
187 bands appeared abnormal (Fig. 2F). Like GNOM, *GNOM<sup>3CS</sup>* did not interact with GNL1, but  
188 interacted with GNOM (Fig. 2G). This suggests that the initial self-recognition of DCB<sup>GNOM</sup>  
189 might not be affected by the 3CS substitution, although no stable DCB-DCB interaction of  
190 *GNOM<sup>3CS</sup>* was detected in the yeast two-hybrid assay (see Fig. 2E). It is also noteworthy  
191 that all but one of the C residues of DCB<sup>GNOM</sup> are conserved in DCB<sup>GNL1</sup>. This suggests a  
192 more general role of the C-C bridges in stabilising the structure of the DCB domain, which  
193 might support its ability to interact with another DCB domain and/or a  $\Delta$ DCB fragment. In  
194 contrast to the C-to-S substitution variants with their critical residues in the C-terminal half of  
195 the DCB domain, chimeric DCB domains comprising complementary parts from GNOM and  
196 GNL1 revealed that the N-terminal aa1-144 determined the DCB-DCB interaction behaviour  
197 according to its origin (Figure 1 – figure supplement 1). In conclusion, the cysteine bridges of  
198 the DCB domain appear to have rather general roles in stabilising the interaction ability of  
199 DCB<sup>GNOM</sup> and DCB<sup>GNL1</sup>, and in this way promote the functionality of both GNOM and GNL1.

200

201 Next we addressed whether DCB-DCB interaction is required for GNOM function and/or  
202 plays a role in preventing GNOM-GNL1 heterodimer formation by expressing, from the  
203 *GNOM* cis-regulatory region, a Myc-tagged chimeric variant that had DCB<sup>GNL1</sup> in place of  
204 DCB<sup>GNOM</sup> (designated DCB<sup>GNL1</sup>: $\Delta$ DCB<sup>GNOM</sup>-Myc) (Figure 2 – figure supplement 1). The  
205 chimera rescued both the *gnom<sup>sgt</sup>* deletion and the *gnom<sup>sgt</sup> gnl1* double mutant (Figure 3 –



206 figure supplement 1). However, the rescued *gnom<sup>sgt</sup> gnl1* plants were strongly reduced in  
 207 size and pollen development was impaired (Figure 3 – figure supplement 1; Suppl. Table 1).  
 208 In the *gnom<sup>sgt</sup>* mutant expressing DCB<sup>GNL1</sup>: $\Delta$ DCB<sup>GNOM</sup>, lateral root development involving  
 209 GNOM-dependent polar recycling of PIN1 (Fig. 3A) and GNOM-dependent root gravitropism  
 210 appeared not to be affected (Fig 3B, *top row*). These results suggested that DCB-DCB  
 211 interaction is not essential for GNOM function.

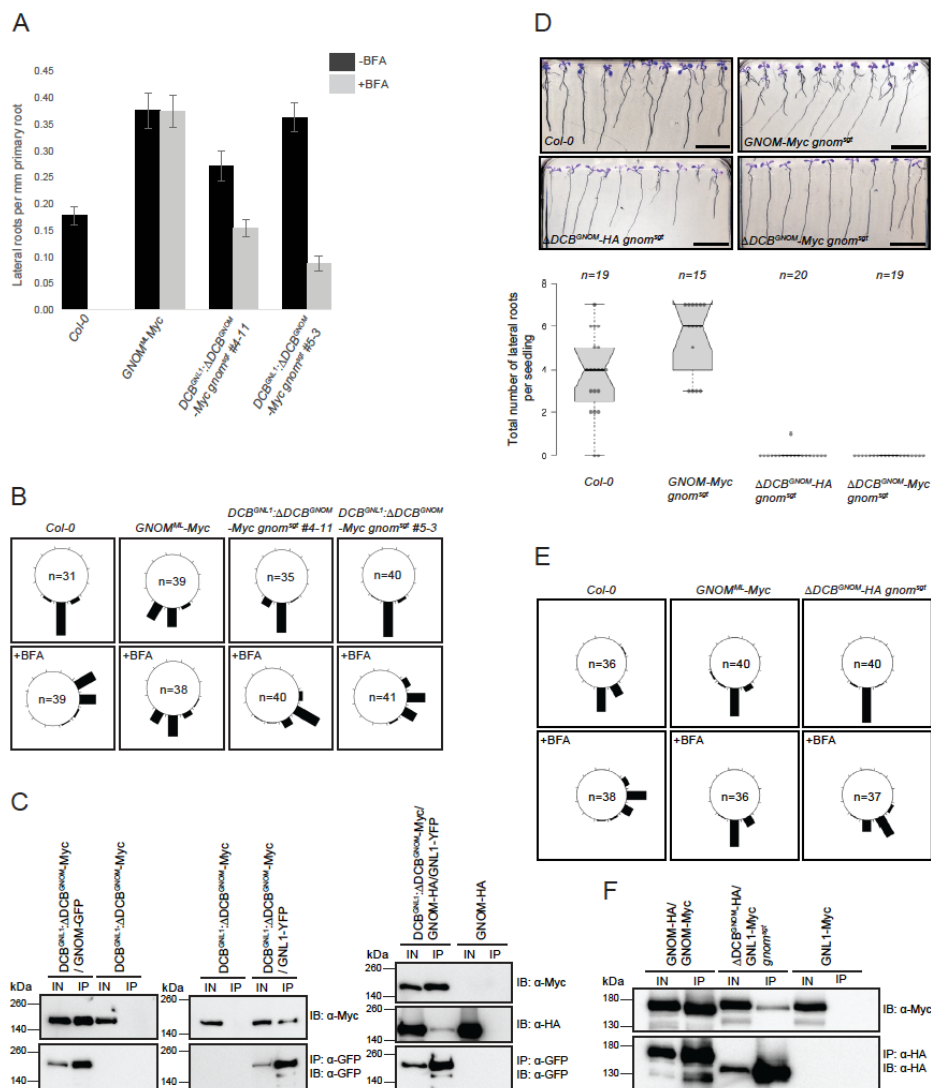

212

213 **Figure 3. Developmental phenotypes and GNOM-GNL1 interaction in *gnom<sup>sgt</sup>* deletion mutants**  
 214 **rescued by DCB<sup>GNL1</sup>: $\Delta$ DCB<sup>GNOM</sup> chimeric protein or  $\Delta$ DCB<sup>GNOM</sup> fragment**  
 215 **(A-C) DCB<sup>GNL1</sup>: $\Delta$ DCB<sup>GNOM</sup> protein. (A) Lateral root development and (B) root gravitropism normal in**  
 216 **the absence of BFA and partially resistant to BFA due to interaction with BFA-resistant GNL1.**  
 217 **Controls: Col-0, wild-type; GNOM<sup>ML</sup>-Myc, BFA-resistant GNOM. 10 $\mu$ M BFA. (C) Interaction of**  
 218 **DCB<sup>GNL1</sup>: $\Delta$ DCB<sup>GNOM</sup>-Myc chimeric protein with both GNOM-GFP (*left*) and GNL1-YFP (*middle*).**  
 219 **Heterotrimer (*right*) with DCB<sup>GNL1</sup>: $\Delta$ DCB<sup>GNOM</sup>-Myc acting as a bridge between GNOM-HA and GNL1-**  
 220 **YFP.**

221 (D-F) HA-tagged or Myc-tagged  $\Delta$ DCB<sup>GNOM</sup> protein. (D) No lateral root development. Controls: Col-0,  
222 wild-type; GNOM<sup>ML</sup>-Myc, BFA-resistant GNOM. (E) Root gravitropism normal in the absence of BFA  
223 and nearly fully resistant to BFA due to interaction with BFA-resistant GNL1. Controls: Col-0, wild-  
224 type; GNOM<sup>ML</sup>-Myc, BFA-resistant GNOM. 10 $\mu$ M BFA. (F) GNOM without DCB domain ( $\Delta$ DCB<sup>GNOM</sup>-  
225 HA) interacting with GNL1-Myc in *gnom*<sup>sgt</sup> homozygous background. (C, F) Protein extracts of  
226 Arabidopsis seedlings expressing differently tagged proteins were subjected to co-  
227 immunoprecipitation analysis. Total extracts (IN) and immunoprecipitates (IP) were separated by  
228 SDS-PAGE and probed with specific antisera (IB) indicated on the right; protein sizes are given in  
229 kDa on the left.

230 **Figure 3 – figure supplement 1.** Postembryonic phenotypes of *gnom*<sup>sgt</sup> deletion mutant and *gnom*<sup>sgt</sup>  
231 *gnl1* double mutant rescued by expression of chimeric DCB<sup>GNL1</sup>: $\Delta$ DCB<sup>GNOM</sup> or  $\Delta$ DCB<sup>GNOM</sup> protein  
232 **Figure 3 – figure supplement 2.** NAA-induced lateral root initiation in *gnom*<sup>sgt</sup> seedlings rescued by  
233  $\Delta$ DCB<sup>GNOM</sup>  
234

235 Then we subjected the chimera to co-immunoprecipitation analysis. The Myc-tagged  
236 DCB<sup>GNL1</sup>: $\Delta$ DCB<sup>GNOM</sup> chimera interacted with both GNOM and GNL1 presumably because the  
237 lack of DCB-DCB interaction allowed for interaction of the chimera with the two endogenous  
238 paralogous ARF-GEFs (Fig. 3C). Moreover, GNOM was also co-immunoprecipitated with  
239 GNL1 in the presence of the chimera which thus appears to act as a bridging protein,  
240 enabling the formation of ARF-GEF heterotrimers (Fig. 3C, compare with Fig. 1B). The  
241 interaction of the chimera with GNL1 became functionally relevant when the seedlings were  
242 exposed to the fungal inhibitor brefeldin A (BFA). BFA inhibits the GDP-GTP exchange  
243 activity of GNOM whereas GNL1 is a BFA-resistant ARF-GEF (Geldner et al., 2003; Richter  
244 et al., 2007). Both lateral root development and root gravitropism were partially resistant to  
245 BFA in *gnom* mutant seedlings rescued by DCB<sup>GNL1</sup>: $\Delta$ DCB<sup>GNOM</sup> in comparison to the BFA-  
246 sensitive wild-type control, consistent with the formation of DCB<sup>GNL1</sup>: $\Delta$ DCB<sup>GNOM</sup>-GNL1  
247 heterodimers (Fig. 3A; Fig. 3B, *bottom row*). Assuming that GNL1 confers BFA resistance to  
248 the heterodimer, partial BFA resistance suggests that only some DCB<sup>GNL1</sup>: $\Delta$ DCB<sup>GNOM</sup>-GNL1  
249 heterodimers are formed in addition to BFA-sensitive DCB<sup>GNL1</sup>: $\Delta$ DCB<sup>GNOM</sup> homodimers. In  
250 conclusion, DCB-DCB interaction is not essential for GNOM function but appears to be  
251 involved in preventing the formation of GNOM-GNL1 heterodimers.

252

253 The occurrence of DCB<sup>GNL1</sup>: $\Delta$ DCB<sup>GNOM</sup>-GNL1 heterodimers made us consider the possibility  
254 of full-length GNL1 interacting with the GNOM fragment lacking the DCB domain

255 ( $\Delta$ DCB<sup>GNOM</sup>), which was expressed from the *GNOM* cis-regulatory region in the *gnom<sup>sgt</sup>*  
256 background (Figure 2 – figure supplement 1). Indeed,  $\Delta$ DCB<sup>GNOM</sup> was able to rescue the  
257 *gnom<sup>sgt</sup>* deletion mutant, which can be attributed to its interaction with GNL1 since DCB-  
258  $\Delta$ DCB interaction is necessary for membrane association and function of GNOM (Anders et  
259 al., 2008; Fig. 3F; Figure 3 – figure supplement 1). This interpretation was supported by the  
260 observation that root gravitropism was normal and almost fully resistant to BFA in *gnom<sup>sgt</sup>*  
261 mutant seedlings rescued by  $\Delta$ DCB<sup>GNOM</sup>, very much like in engineered BFA-resistant GNOM  
262 and in contrast to the BFA-sensitive wild-type control (Fig. 3E, *bottom row*). This result  
263 indicates that the GNOM activity required for root gravitropism was entirely provided by  
264  $\Delta$ DCB<sup>GNOM</sup>-GNL1 heterodimers. Consistent with this,  $\Delta$ DCB<sup>GNOM</sup> did not rescue the *gnom<sup>sgt</sup>*  
265 *gnl1* double mutant (Suppl. Table 2A). Similarly,  $\Delta$ DCB<sup>GNOM</sup> bearing the *B4049* mutation  
266 failed to rescue the *gnom<sup>sgt</sup>* deletion mutant (Suppl. Table 2B), which can be attributed to the  
267 failure of DCB<sup>GNL1</sup> to interact with  $\Delta$ DCB<sup>GNOM-B4049</sup> (see Fig. 1G). In addition, unlike  
268  $\Delta$ DCB<sup>GNOM</sup>,  $\Delta$ DCB<sup>GNOM-B4049</sup> does not interact with full-length GNOM since the *B4049*  
269 mutation (G<sub>579</sub>R substitution) abolishes the DCB- $\Delta$ DCB interaction, and *B4049* consequently  
270 interferes with membrane-association of GNOM (Anders et al., 2008). Thus, in contrast to  
271 the chimeric protein DCB<sup>GNL1</sup>: $\Delta$ DCB<sup>GNOM</sup> which was active on its own, the *gnom<sup>sgt</sup>* rescue of  
272  $\Delta$ DCB<sup>GNOM</sup> required the interaction with the DCB domain of full-length GNL1. This interaction  
273 provided membrane association competence, thus revealing the endosomal targeting  
274 potential of  $\Delta$ DCB<sup>GNOM</sup>. Importantly, although *gnom<sup>sgt</sup>* deletion plants were rescued by the  
275  $\Delta$ DCB<sup>GNOM</sup> transgene, they showed specific abnormalities. Lateral root formation was  
276 completely abolished in  $\Delta$ DCB<sup>GNOM</sup> transgenic *gnom<sup>sgt</sup>* mutants in comparison to wildtype  
277 controls (Fig. 3D). Treatment of seedlings with the auxin analogue NAA over night or for 2  
278 days promotes lateral root formation from pericycle cells in wildtype. In contrast, *gnom<sup>sgt</sup>*  
279 mutants rescued by  $\Delta$ DCB<sup>GNOM</sup> often displayed strong proliferation of pericycle cells, which  
280 frequently resulted in multiple lateral root primordia; however, only some of these primordia  
281 were almost shaped like wild-type primordia (Figure 3 – figure supplement 2) and no

282 primordia developed into lateral roots (see Fig. 3D). These results suggest that lateral root  
 283 development might be particularly sensitive to GNL1- $\Delta$ DCB<sup>GNOM</sup> heterodimer formation since  
 284 both GNOM-dependent endosomal recycling and GNL1-mediated secretion are  
 285 simultaneously required during lateral root formation.  
 286

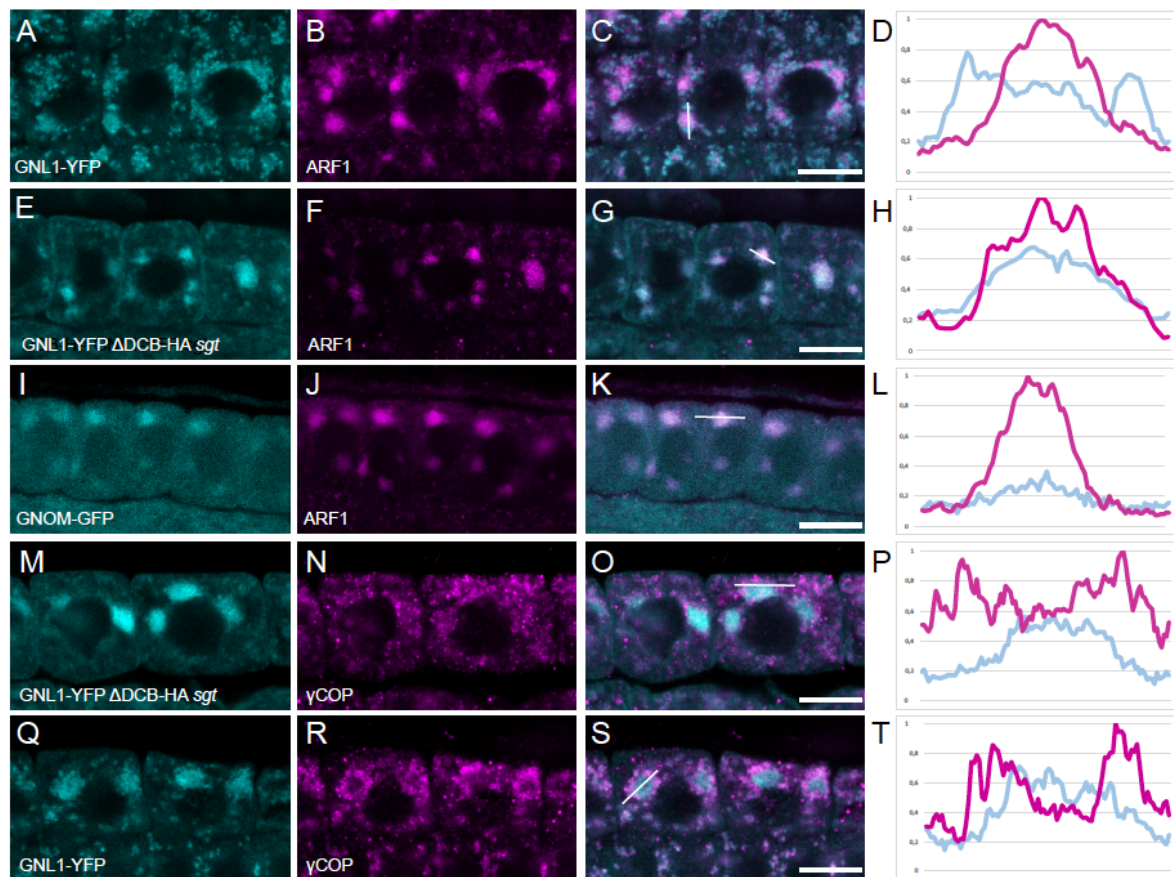

287

288 **Figure 4. Subcellular relocation of Golgi-associated GNL1 to endosomes by interaction with**  
 289  **$\Delta$ DCB<sup>GNOM</sup>**

290 Seedlings expressing (A-H, M-T) GNL1-YFP or (I-L) GNOM-GFP were treated with 50  $\mu$ M BFA for 1  
 291 h before fixation and immunostaining with anti-ARF1 antiserum (A-L, magenta) or anti- $\gamma$ COP  
 292 antiserum (M-T, magenta). Line scans (right panels) as indicated by the white lines in the adjacent  
 293 panels.

294 *GNOM* genotypes: (A-D, I-L, Q-T) wild-type; (E-H, M-P) *sgt* (*GNOM* and 4 adjacent genes on either  
 295 side deleted) expressing  $\Delta$ DCB<sup>GNOM</sup>. Note shift of GNL1 from  $\gamma$ COP-positive Golgi stacks to ARF1-  
 296 positive BFA compartment caused by absence of DCB<sup>GNOM</sup>.  
 297

298 Because membrane association requires DCB- $\Delta$ DCB interaction (Anders et al., 2008),  
 299 rescue of the *gnom*<sup>sgt</sup> deletion mutant by the  $\Delta$ DCB<sup>GNOM</sup> fragment would imply subcellular  
 300 relocation of GNL1 from Golgi stacks to the endosomal membranes where GNOM mediates

301 polar recycling of PIN1 to the basal plasma membrane (Fig. 4). Using ARF1 as a marker for  
 302 the endosomal BFA compartment, we detected GNL1 in the surrounding Golgi stacks, which  
 303 is its normal location (Fig. 4A-D). In the presence of  $\Delta$ DCB<sup>GNOM</sup>, however, GNL1 co-localised  
 304 with ARF1 very much like GNOM (Fig. 4E-H, compare with Fig. 4I-L). The relocation of  
 305 GNL1 caused by  $\Delta$ DCB<sup>GNOM</sup> was also detectable using the Golgi marker  $\gamma$ COP as a  
 306 reference which in addition, indicated that COPI recruitment was still functional, presumably  
 307 due to the formation of GNL1-GNL1 homodimers (Fig. 4M-P, compare with Fig. 4Q-T).  
 308 These observations suggest that by DCB- $\Delta$ DCB interaction with full-length GNL1, the  
 309  $\Delta$ DCB<sup>GNOM</sup> fragment gains the ability to associate with membranes and directs the  
 310 heterodimer to endosomal membranes, thus providing GNOM activity. However, this rescue  
 311 of GNOM-dependent recycling by GNL1 appears to be contingent upon the demand for  
 312 GNL1-mediated secretion as seen for example in lateral root development (see Fig. 3D).  
 313

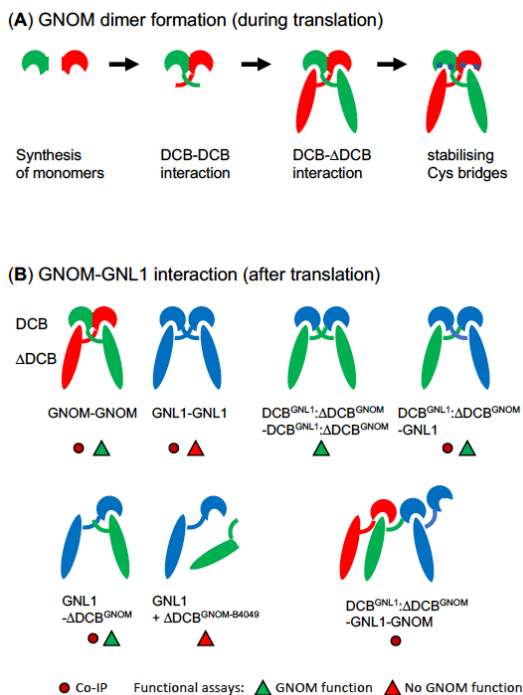

314

315 **Figure 5. Role of DCB domain in GNOM dimer formation and GNOM-GNL1 interaction (model)**

316 (A) Stepwise GNOM dimer formation during or immediately after translation. Interaction between two  
 317 N-terminal DCB domains initiates dimer formation. The pair of fully translated proteins undergoes two  
 318 DCB- $\Delta$ DCB interactions followed by the formation of stabilising Cys bridges (blue dots).

319 (B) GNOM-GNL1 interactions established after translation. GNL1 and a chimeric DCB<sup>GNL1</sup>: $\Delta$ DCB<sup>GNOM</sup>  
 320 protein with GNOM function form dimers only mediated by DCB- $\Delta$ DCB interactions. Chimeric

321 DCB<sup>GNL1</sup>: $\Delta$ DCB<sup>GNOM</sup> protein can also act as a bridge between GNOM and GNL1 that do not interact  
322 directly. GNL1 interacts with  $\Delta$ DCB<sup>GNOM</sup> but not the mutant variant  $\Delta$ DCB<sup>GNOM-B4049</sup> that cannot interact  
323 with the DCB domain.  
324

## 325 Discussion

326

327 The paralogous ARF-GEFs GNOM and GNL1 are functionally divergent, with only GNOM  
328 required for polar recycling of auxin efflux carrier PIN1. Although they are expressed in the  
329 same cells, GNOM and GNL1 form homodimers but no heterodimers. To address the  
330 biological significance of preventing heterodimer formation, we engineered GNOM-GNL1  
331 heterodimers, for example by deleting the N-terminal dimerisation domain of GNOM. The  
332  $\Delta$ DCB<sup>GNOM</sup> fragment interacted with full-length GNL1, presumably via DCB- $\Delta$ DCB interaction  
333 required for membrane association as evidenced in the yeast two-hybrid interaction assay,  
334 and targeted the heterodimer to endosomes where GNOM normally acts. While the  
335  $\Delta$ DCB<sup>GNOM</sup>-GNL1 heterodimer was able to suppress the lethality of *gnom<sup>sgt</sup>* deletion mutant,  
336 lateral root development of the rescued seedlings was completely blocked. This deleterious  
337 effect demonstrated the necessity of keeping GNOM and GNL1 separate. In contrast to the  
338  $\Delta$ DCB<sup>GNOM</sup>-GNL1 heterodimer, the heterodimer consisting of chimeric DCB<sup>GNL1</sup>: $\Delta$ DCB<sup>GNOM</sup>  
339 and full-length GNL1 had no such deleterious effect. However, the chimeric  
340 DCB<sup>GNL1</sup>: $\Delta$ DCB<sup>GNOM</sup> protein was active on its own rather than dependent on its interaction  
341 with GNL1, as indicated by its rescue of the *gnom<sup>sgt</sup> gnl1* double mutant. Thus, lateral root  
342 development of rescued *gnom<sup>sgt</sup>* seedlings was promoted by the separate activities of the  
343 chimeric DCB<sup>GNL1</sup>: $\Delta$ DCB<sup>GNOM</sup> homodimers mediating endosomal recycling and GNL1  
344 homodimers involved in COPI traffic required for secretion, although heterodimers consisting  
345 of chimeric DCB<sup>GNL1</sup>: $\Delta$ DCB<sup>GNOM</sup> and full-length GNL1 also occurred. In conclusion, our  
346 observations suggest that coupling of GNOM-dependent recycling and GNL1-dependent  
347 secretion might be disadvantageous in competitive non-laboratory conditions, which would  
348 explain why the formation of GNOM-GNL1 heterodimers is normally prevented.

349

350 How is the formation of GNOM-GNL1 heterodimers prevented? Our results indicate that both  
351 GNOM and GNL1 form homodimers constitutively, i.e. only dimers but no monomers were  
352 detected both in the cytosol and on membranes. Thus, there seems to be a propensity of  
353 GNOM and GNL1 monomers to form (homo)dimers. The simplest assumption would be that  
354 the homodimers form during or immediately after protein synthesis, although direct evidence  
355 is lacking. Co-translational assembly of protein complexes has been reported before (Wells  
356 et al., 2015; Natan et al., 2017, 2018). In the case of GNOM, this precocious dimer formation  
357 is conceivable since the DCB domain of one GNOM protein interacts with the DCB domain  
358 of another GNOM protein and the DCB domain is located at the very N-terminus. Both  
359 GNOM and GNL1 use rare codons such that the rate of translation might be slow enough for  
360 folding of the DCB domain to occur while their translation is still ongoing. This “head start” of  
361 paired-up DCB<sup>GNOM</sup> domains would facilitate their interactions with the two physically linked  
362  $\Delta$ DCB<sup>GNOM</sup> fragments (Fig. 5A). In essence, this early homodimer formation would deplete  
363 the cell of GNOM monomers such that GNL1 monomers would be left to interact with one  
364 another to form (homo)dimers and thus, the formation of deleterious GNOM-GNL1  
365 heterodimers might be prevented.

366

367 Our model predicts that if no initial DCB-DCB interaction takes place as in  
368 DCB<sup>GNL1</sup>: $\Delta$ DCB<sup>GNOM</sup> chimeric protein or  $\Delta$ DCB<sup>GNOM</sup> fragment, there will be opportunity for  
369 interaction of the GNOM variant with GNL1, resulting in the formation of heterodimers to  
370 some extent or even heterotrimers as in the case of GNOM-DCB<sup>GNL1</sup>: $\Delta$ DCB<sup>GNOM</sup>-GNL1  
371 detected by co-IP (Fig. 5B; see Fig. 3C). The opportunity for heterodimer formation also  
372 explains the complementation of mutant or truncated GNOM variants in the presence of  
373 GNL1 (Fig. 5B). Furthermore, the specific features of the individual GNOM variants  
374 determine whether their interaction with GNL1 leads to restoration of GNOM function (Fig.  
375 5B).

376

377 Once the GNOM homodimer is fully formed including the DCB- $\Delta$ DCB interactions, cysteine-  
378 cysteine bridges appear to stabilise DCB-DCB and DCB- $\Delta$ DCB interactions between the  
379 identical subunits (Fig. 5A). This stabilisation might preclude the subsequent exchange of  
380 subunits between different GNOM homodimers as well as with GNL1 homodimers. Although  
381 Cys-to-Ser substitutions introduced into the DCB domain of GNOM appeared to affect DCB-  
382 DCB interactions more strongly than DCB- $\Delta$ DCB interactions, they seem to have general  
383 destabilising effects. It is thus likely that the Cys-to-Ser substitutions might only affect the  
384 stability, but not the initial formation, of the DCB-DCB interaction and thus do not interfere  
385 with precocious GNOM homodimer formation.

386

387 The mechanism proposed here for preventing GNOM-GNL1 heterodimer formation contrasts  
388 with the situation in bacteria where histidine kinases only form homomers to prevent cross-  
389 signalling, and this is mediated by a dimerisation domain that in each paralogue interacts  
390 with itself but not with its counterpart in other paralogues (Ashenberg et al., 2011).  
391 Nonetheless, preventing heterodimers of functionally divergent paralogues has comparable  
392 effects in the two systems: like bacterial signalling pathways, plant trafficking pathways such  
393 as secretion and recycling can be regulated independently to meet specific challenges.

394

395

## 396 **Materials and Methods**

397

### 398 *Plant genotypes and growth conditions*

399 Columbia-0 (Col-0) and Landsberg *erecta* (Ler) were the *Arabidopsis thaliana* wild-type  
400 accessions used. The following mutant genotypes have been described previously: *gnom*  
401 alleles *emb30* and *B4049* (Busch et al., 1996), *gnom<sup>sgt</sup>* deletion (Brumm et al., 2020), *gnl1* T-  
402 DNA insertion (Richter et al., 2007), transgenic lines *GNOM-Myc*, *GNOM<sup>ML</sup>-Myc* and *GNOM-*  
403 *GFP* (Geldner et al., 2003),  $\Delta$ DCB<sup>GNOM-HA</sup>,  $\Delta$ DCB<sup>GNOM-Myc</sup> and *XLIM- $\Delta$ DCB<sup>GNOM-B4049</sup>-Myc*



404 (Anders et al., 2008), *GNL1-YFP*, *GNL1-Myc* and *GNL1<sup>LM</sup>-Myc* (Richter et al., 2007).  
405  $\Delta DCB^{GNOM-HA}$ ,  $\Delta DCB^{GNOM-Myc}$  and *XLIM- $\Delta DCB^{GNOM-B4049}$ -Myc* were again transformed into  
406 Col-0 and then crossed into the *gnom<sup>sgt</sup>* background in order to generate more independent  
407 transgenic lines.  
408 Plants were grown on soil or agar plates under permanent light conditions (Osram L18W/840  
409 cool white lamps) at 23°C and 40% humidity in growth chambers.  
410  
411 *Binary vector constructs, generation of transgenic plants, PCR genotyping and crosses*  
412 *XLIM- $\Delta DCB^{GNOM-B4049}$ -Myc*,  $\Delta DCB^{GNOM-HA}$ ,  $\Delta DCB^{GNOM-Myc}$  were crossed and/or transformed  
413 into heterozygous *gnom<sup>sgt</sup>/GNOM* and *gnom<sup>sgt</sup>/GNOM gnl1/GNL1* double mutant and  
414 analysed for complementation. Of three independent transgenic lines with good expression,  
415 one was chosen for further analysis. For co-immunoprecipitation analysis and whole-mount  
416 immunofluorescence staining, *GNL1-Myc* or *GNL1-YFP* were crossed with  $\Delta DCB^{GNOM-HA}$  in  
417 the *gnom<sup>sgt</sup>* mutant background.  
418 To generate the  $DCB^{GNL1}:\Delta DCB^{GNOM}$  chimera, the DCB domain of *GNL1* was amplified via  
419 primer extension PCR and inserted, via *PmeI* und *SwaI* restriction sites, into the genomic  
420 fragment *GNXbaI<sup>wt</sup>-myc* (Geldner et al., 2003) in pBlueScript. The following primers were  
421 used:  
422 GN\_DCB\_UP\_F 5' TCGTTCTAGCGTCGAACAACTCCTCGTTTTCTTTGATTTCGCATTG  
423 3'  
424 GN\_DCB\_UP\_R 5' CCCGAAGGATGATTCTGATACCCCATTTAATCTGCTCAAATCTTCA  
425 3'  
426 GNL1\_DCB\_S 5' TGAAGATTTGAGCAGATTAATGGGGTATCAGAATCATCCTTCGGG 3'  
427 GNL1\_DCB\_AS 5' TCTGTTCTTTCAACATCTGGAAGTTGAGAGAAGATAACATCTAATC 3'  
428 GN\_DCB\_DW\_F 5' GATTAGATGTATCTTCTCTCAACTTCCAGATGTTGAAAGAACAGA 3'  
429 GN\_DCB\_DW\_R 5' TGGTCTAAATTCTCTAGTAGTGATCTTTGACTCGCACTAGGAAAA 3'

430 The pGN:DCB<sup>GNL1</sup>:ΔDCB<sup>GNOM</sup>-Myc fragment was first inserted into an intermediate pBar  
431 vector via XbaI restriction sites and afterwards introduced into pGII(BAR) expression vector  
432 and transformed into Col-0 background. T1 plants were selected using phosphinotricine.  
433 Lines showing good expression were crossed with heterozygous *gnom<sup>sgt</sup>/GNOM*, *gnl1/GNL1*  
434 and *gnom<sup>sgt</sup>/GNOM gnl1/GNL1* double mutants. For co-immunoprecipitation analysis,  
435 transgenic plants expressing DCB<sup>GNL1</sup>:ΔDCB<sup>GNOM</sup>-Myc from *GNOM* regulatory sequences  
436 were crossed with plants bearing the transgenes *GNOM-GFP* or *GNL1-YFP*.

437 To generate *GNOM* coding sequences with the desired C-to-S mutations (*GNOM<sup>xCS</sup>*) for  
438 plant expression, the respective DCB<sup>GNOM-xCS</sup> fragment was amplified from the yeast vector  
439 (*pJG4-5-DCB<sup>GNOM-xCS</sup>*) using the following primers:

440 GNDCB\_YV\_F: 5` CTCCCGAATTCGCAGATTTAATGGGTGCGCCTA 3`

441 GNDCB\_YV\_R: 5`GCTTCTCGAGCTATTGTTTGATGCTAC 3`.

442 The purified PCR product was used as primer pair for site-directed mutagenesis of  
443 *pDONOR221-GNOM* to obtain *pDONOR221-GNOM<sup>xCS</sup>*. The yeast vector harbouring  
444 *DCB<sup>GNOM</sup>* and *DCB<sup>GNOM-xCS</sup>* had an un-annotated V210I mutation, which was repaired by site-  
445 directed mutagenesis of *pDONOR221-GNOM<sup>xCS</sup>* plasmid using the following primers:

446 GNOM\_DCB\_Ile-Val\_F: 5` GTTATTGCAACGAGTAGCTCGCCACACGATGCA

447 GNOM\_DCB\_Ile-Val\_R: 5` CGTGTGGCGAGCTACTCGTTGCAATAACTCA.

448 The sequence corresponding to the N-terminal part of *GNOM<sup>xCS</sup>* (1- 682 amino acids) was  
449 amplified from *pDONOR221-GNOM<sup>xCS</sup>* plasmid and cloned into a pre-existing *pGII(Bar)-*  
450 *pGNOM:GNOM-YFP* plasmid using PspXI (New England Biolabs catalogue no R0656) and  
451 MscI (Thermo Scientific catalogue no ER1211) enzymes to generate *pGII(Bar)-*  
452 *pGNOM:GNOM<sup>xCS</sup>-YFP*. The following primers were used for amplification of *GNOM<sup>xCS</sup>* (1-  
453 682 amino acids):

454 DCB\_CS\_PspXI\_LinkerAvrII: 5` CTTCTCGAGGTCCTAGGACATGGGTGCGCCTAAAGTT  
455 3`

456 pGIIGNOM\_DCB\_CS\_MscI: 5` CCTTTGGCCAGAATCTCAGGAGATTGCATATAGTA 3`

457 To generate *pGII(Bar)-pGNOM:GNOM<sup>4CS</sup>-Myc*, the *YFP* sequence in *pGII(Bar)-*  
458 *pGNOM:GNOM<sup>4CS</sup>-YFP* was replaced by a *3xMyc* sequence using *SmaI* and *XbaI* restriction  
459 sites.

460 The binary vectors were transformed into *Arabidopsis* wild-type (Col-0) and T1 plants were  
461 selected using BASTA (Bayer catalogue no 79011725). T1 Plants showing good expression  
462 were used for crossing with *gnom<sup>sgt</sup>/GNOM*, *gnom<sup>sgt</sup>/GNOM gnl1/GNL* or other transgenic  
463 lines.

464 Genotyping of *gnom<sup>sgt</sup>* was performed using the following primers:

465 GN\_overtag\_S: 5` GAAAGTGAAAGTAAGAGGC 3`

466 GN\_overtag\_AS: 5` CGTAGAGAGGTGTTACATAAG 3`

467 Genotyping of *gnl1* was performed as described earlier (Richter et al., 2007).

468

469 *Yeast two-hybrid interaction assays*

470 DCB<sup>GNOM</sup> (aa1-246), ΔDCB<sup>GNOM</sup> (aa232-1451), ΔDCB<sup>GNOM-B4049</sup> (aa232-1451; G<sub>579</sub>R, B4049  
471 mutation) and ΔDCB<sup>GNOM-HUS-BOX</sup> (aa232-1451; D<sub>468</sub>G, mutation in HUS box) constructs and  
472 assay were as described (Grebe et al., 2000; Anders et al., 2008).

473 DCB<sup>GNL1</sup> (aa1-244) was cloned into standard yeast two-hybrid vectors pEG202 and pJG4-5  
474 via PCR-introduced *EcoRI* and *XhoI* restriction sites. ΔDCB<sup>GNL1</sup> (aa245-1443) was cloned  
475 into modified pEG202 and pJG4-5 vectors (in which the *EcoRI* restriction site in the MCS  
476 was replaced by a *NotI* site; designated pM8 and pM5; Grebe et al., 2000) via *NotI* and *XhoI*.

477 DCB<sup>GNOM-1CS</sup> was synthesized by the company BaseGene B.V. (Leiden, Netherlands) and  
478 then cloned into pEG202 and pJG4-5 via *EcoRI* and *XhoI*.

479 The generation of DCB<sup>GNOM:GNL1</sup> chimeras was based on subdivision of the DCB domains  
480 into four fragments, each representing roughly one quarter of the domain (Figure 1 – figure  
481 supplement 1): For DCB<sup>GNOM</sup> the first quarter comprises base pairs (bp) 1-183/ amino acids  
482 (aa) 1-61; the second quarter bp 184-432 / aa 62-144; the third quarter bp 433-528 / aa 145-  
483 176.; and the fourth quarter bp 529-672 / aa 177-224. For DCB<sup>GNL1</sup> the subdivision is as

484 follows: bp 1-177 / aa 1-59; bp 178-426 / aa 60-142; bp 427-528 / aa 143-176; bp 529-732 /  
 485 aa 177-244. The respective borders for these “quarters” were chosen based on a sequence  
 486 alignment between DCB<sup>GNOM</sup> and DCB<sup>GNL1</sup>.

487 Chimeras 1, 2, 3, and 4 were generated via PCR. In two individual PCR reactions on GNOM  
 488 and GNL1 templates, an N-terminal and a C-terminal fragment comprising the respective  
 489 number of quarters were created. Overlaps between them were introduced on one side of  
 490 each fragment through primer extension. A third PCR using these overlapping fragments as  
 491 templates produced the unified chimeric DCB sequence.

492 Chimera 5 was generated using chimera 4 and GNL1 as templates for the first two PCRs,  
 493 and chimera 6 was generated using chimera 1 and GNOM as templates, followed by the  
 494 joining PCRs.

495 All chimeric DCB sequences were then cloned into pEG202 and pJG4-5 via EcoRI and XhoI  
 496 restriction sites. The restriction enzymes were supplied by New England Biolabs and have  
 497 the following catalogue numbers: EcoRI (R3101S), XhoI (R0146L), NotI (R3189L).

498 The following primers were used:

499

|                                      |               |                                  |
|--------------------------------------|---------------|----------------------------------|
| DCB <sup>GNL1</sup><br>(aa1-244)     | fw            | AAGAATTCATGGGGTATCAGAATCATCC     |
|                                      | rv            | TTCTCGAGTTATGTTCCACCTTATTGTCGAC  |
| ΔDCB <sup>GNL1</sup><br>(aa245-1443) | fw            | TAGCGGCCGCGTGGACTGGGATCCGAATTCTG |
|                                      | rv            | ATATCTCGAGTCAGACCTCATTCCCGGTAC   |
| Chimera 1                            | N-fragment fw | GAATTCATGGGTCGCCTAAAGTTGCATTC    |
|                                      | N-fragment rv | GCTCTAACTGATCATCACCAGACATGTATC   |
|                                      | C-fragment fw | TGGTGATGATCAGTTAGAGCATTCTCTTAT   |
|                                      | C-fragment rv | TTCTCGAGTTATGTTCCACCTTATTGTCGAC  |
| Chimera 2                            | N-fragment fw | GAATTCATGGGTCGCCTAAAGTTGCATTC    |

|           |               |                                   |
|-----------|---------------|-----------------------------------|
|           | N-fragment rv | ACAGCTTTTTACAGAATCAACTACCAAGTGCA  |
|           | C-fragment fw | TAGTTGATTCTGTAAAAAGCTGTCGTTTCGA   |
|           | C-fragment rv | TTCTCGAGTTATGTTCCCACCTTATTGTCGAC  |
| Chimera 3 | N-fragment fw | AAGAATTCATGGGGTATCAGAATCATCC      |
|           | N-fragment rv | AGCTTGTCACAGCATCAACTATTATATGCA    |
|           | C-fragment fw | AGTTGATGCTGTGACAAGCTGTCGATTTGA    |
|           | C-fragment rv | TTCTTCGAGCTATTGTTTGATGCTACCAGCTCT |
| Chimera 4 | N-fragment fw | AAGAATTCATGGGGTATCAGAATCATCC      |
|           | N-fragment rv | CGATATATAGCAGATGATGATCAACTAGAACAC |
|           | C-fragment fw | CAGATGATGATCAACTAGAACACTCGTTGATTC |
|           | C-fragment rv | TTCTTCGAGCTATTGTTTGATGCTACCAGCTCT |
| Chimera 5 | N-fragment fw | AAGAATTCATGGGGTATCAGAATCATCC      |
|           | N-fragment rv | ACAGCTTTTTACAGAATCAACTACCAAGTGCA  |
|           | C-fragment fw | TAGTTGATTCTGTAAAAAGCTGTCGTTTCGA   |
|           | C-fragment rv | TTCTCGAGTTATGTTCCCACCTTATTGTCGAC  |
| Chimera 6 | N-fragment fw | GAATTCATGGGTCGCCTAAAGTTGCATTC     |
|           | N-fragment rv | AGCTTGTCACAGCATCAACTATTATATGCA    |
|           | C-fragment fw | AGTTGATGCTGTGACAAGCTGTCGATTTGA    |
|           | C-fragment rv | TTCTTCGAGCTATTGTTTGATGCTACCAGCTCT |

500

501 To introduce C-to-S mutations into  $DCB^{GNOM}$ , primer-based mutagenesis was performed on  
 502  $pJG4-5-DCB^{GNOM}$  plasmid as template. PCR products carrying different C-to-S mutations  
 503 were combined by primer extension PCR to generate  $DCB^{GNOM-7CS}$ ,  $DCB^{GNOM-4CS}$ , and  
 504  $DCB^{GNOM-3CS}$  and cloned in  $pEG202$  and  $pJG4-5$  vectors using EcoRI and XhoI. The  
 505 following primers were used for  $DCB^{GNOM}$  mutagenesis and cloning:

506 GNDCB\_YV\_F: 5' CTCCCGAATTCGCAGATTTAATGGGTGCCTA 3'

507 GNDCB\_C22S\_R: 5' AGTGGTTGTACTTGAATCAGTACTCTCAAAG 3'

508 GNDCB\_C33S\_F: 5` GATTCAAGTAATACAACCACTTTAGCAAGCATGA 3`  
509 GNDCB\_C148S\_R: 5` CTCAAATCGACTGCTTGTACACAGA 3`  
510 GNDCB\_C148S\_F: 5` TCTGTGACAAGCAGTCGATTTGAGGTG 3`  
511 GNDCB\_C172S\_R: 5` GATGCTTTATTTTTCATACTTGCTAGAAGAAC 3`  
512 GNDCB\_C172S\_F: 5` GTTCTTCTAGCAAGTATGAAAAATAAAGCATC 3`  
513 GNDCB\_C187&193S\_R: 5` GAAACTAGTGTTGACGACAGTGCTTACATG 3`  
514 GNDCB\_C187&193S\_F: 5` CATGTAAGCACTGTCGTCAACACTAGTTTTTC 3`  
515 GNDCB\_C221S\_R: 5` GATGCGAGAAGATACTCCTCACTAATTC 3`  
516 GNDCB\_C221S\_F: 5` GAATTAGTGAGGAGTATCTTCTCGCATC 3`  
517 GNDCB\_S172C\_R: 5` GATGCTTTATTTTTCATACATGCTAGAAGAAC 3`  
518 GNDCB\_S172C\_F: 5` GTTCTTCTAGCATGTATGAAAAATAAAGCATC 3`  
519 GNDCB\_YV\_R: 5` GCTTCTCGAGCTATTGTTTGATGCTAC 3`

520

#### 521 *Yeast two-hybrid – quantitative oNPG assays*

522 The quantitative oNPG assays shown in Figure 1D-H and Figure 1 – figure supplement 1  
523 were done as follows. For each tested combination, six biological replicates (yeast cultures)  
524 were harvested after determining OD600, and then each subdivided into two technical  
525 replicates. After measurement of absorption at 420nm, mean values for each pair of  
526 technical replicates were calculated and then used to calculate the  $\beta$ -galactosidase activity  
527 of the biological replicates, of which again a mean value as well as standard deviation was  
528 calculated. Of the six determined  $\beta$ -galactosidase activity values for each interactor  
529 combination, the highest and lowest values were excluded from the calculation of the mean  
530 activity, resulting in a sample size of n=4. The experiment shown in Fig. 1E was performed  
531 three times with similar results, the other ONPG assays once. The yeast cultures were  
532 randomly picked and inoculated. The scientists performing the experiments were aware of  
533 sample identity.

534

#### 535 *Physiological assays*

536 Root gravitropic response of 50 five-days old seedlings was measured by ImageJ software  
537 after transferring seedlings to BM plates (no brefeldin A, BFA) or agar plates containing 10  
538  $\mu\text{M}$  BFA (Sigma catalogue no: B7651) and rotating the plates vertically by  $135^\circ$  for 24h  
539 (Richter et al., 2007) . Lateral root primordia formation was analysed after transferring 7-  
540 days old seedlings to  $5\mu\text{M}$  1-naphthaleneacetic acid (NAA)-containing liquid MS medium  
541 and clearing the roots after treatment overnight or for 2 days (Geldner et al., 2004).-Light  
542 microscopy images were taken with a Zeiss Axiophot microscope, AxioCam and  
543 AxioVision\_4 Software. Image size, brightness and contrast were edited with Adobe  
544 Photoshop CS 3 Software.  
545 For each assay, the experiment was repeated at least twice and the numbers of seedlings  
546 analysed are indicated as n in Fig. 3B, D and E. Fig. 3D shows data from one of 4  
547 experiments, Fig. 3E from one of 6 experiments. Figure 3 – figure supplement 2 shows  
548 images of at least 5 different seedlings from 1 of 3 experiments. In each experiment, 10-20  
549 seedlings were analysed.  
550 Post-embryonic phenotypes shown in Figure 2 – figure supplements 2 and 5, and Figure3 –  
551 figure supplement 1 were from 2 or 3 experiments each involving at least 5 different plants of  
552 the relevant genotype.

553

#### 554 *Live-cell imaging and whole-mount immunofluorescence staining*

555 Live-cell imaging of 5-days old Arabidopsis seedlings was performed after 1h treatment with  
556  $50\mu\text{M}$  BFA (Sigma catalogue no: B7651) and  $2\mu\text{M}$  FM4-64 (SynaptoRed C2, Sigma  
557 catalogue no S6689).  
558 For whole-mount immunofluorescence staining, four to six-days old seedlings were  
559 incubated in 24-well cell-culture plates in  $50\mu\text{M}$  BFA-containing liquid growth medium (0.5x  
560 MS medium, 1% sucrose, pH 5.8) (Duchefa Biochemie catalogue no M0221.005) at  $23^\circ\text{C}$  for  
561 1 hour and then fixed in 4% paraformaldehyde in MTSB at room temperature for 1 hour.  
562 Whole-mount immunofluorescence staining was performed manually (Lauber et al., 1997) or

563 with an InsituPro machine (Intavis; Müller et al., 1998). All antibodies were diluted in 1x PBS  
564 buffer. The following antisera were used for immunofluorescence staining: rabbit polyclonal  
565 anti-ARF1 (Agrisera AS08 325) diluted 1:1000; rabbit polyclonal anti-AtγCOP (Agrisera  
566 AS08 327) diluted 1:1000; goat anti-rabbit CY3-conjugated secondary antibodies (Dianova  
567 catalogue no 111-165-144) were diluted 1:600. Nuclei were stained with 4',6-diamidino-2-  
568 phenylindole (DAPI; Sigma-Aldrich catalogue no D9542, 1:600 dilution). Figure 4 shows  
569 images of seedlings from 1 of 6 experiments. In each experiment, 20-40 seedlings were  
570 mounted for immunostaining and at least 10 roots were analysed per genotype.

571

#### 572 *Confocal microscopy and processing of images*

573 Fluorescence images were acquired at the confocal laser scanning microscope TCS-SP8  
574 from Leica or LSM880 from Zeiss, using a 63x water-immersion objective and Leica or Zeiss  
575 software (Leica LAS X; Zeiss Zen), respectively. Overlays and contrast/brightness  
576 adjustments of images were performed with Adobe Photoshop CS3 software. Intensity line  
577 profiling was performed with Leica software (LAS X).

578

#### 579 *Co-immunoprecipitation analysis*

580 The immunoprecipitation protocol was modified from Singh et al. (2014). Specifically, 0.5-3g  
581 of 8 to 10-days old Arabidopsis seedlings were homogenized in 1:1 lysis buffer (50mM Tris  
582 pH 7.5, 150mM NaCl, 2mM EDTA) containing 1% Triton-X100 and protease inhibitors  
583 (cOmplete EDTA-free®, Roche catalogue no 04693132001). For immunoprecipitation, anti-  
584 Myc-agarose beads (Sigma catalogue no A7470) or anti-HA-agarose beads (Sigma  
585 catalogue no A2095) or GFP-Trap beads (Chromotek catalogue no gta20) were incubated  
586 with plant extracts at 4°C for 2h30min. Beads were then washed twice with wash buffer  
587 containing 0.1% Triton-X100 and 1-2 times without Triton-X100. Bound proteins were eluted  
588 by boiling the beads in 2x Laemmli buffer at 95°C for 5min. All co-immunoprecipitation  
589 experiments were repeated at least twice, except for the trimer co-IP shown in Fig. 3C.

590



591 *Subcellular fractionation*

592 Subcellular fractionation was performed as described (Brumm et al., 2020). Briefly, 3-4 g of  
593 Arabidopsis seedlings were ground in liquid nitrogen, suspended in 2x volume of lysis buffer  
594 (50mM Tris pH 7.5, 150mM NaCl, 2mM EDTA) supplemented with protease inhibitors  
595 (cOmplete EDTA-free®, Roche catalogue no 04693132001) and centrifuged at 10,000 x *g*  
596 for 15 min at 4°C. The supernatant (S10) was subjected to 100.000 x *g* centrifugation for 1h  
597 at 4°C. The pellet (P100) was suspended in extraction buffer containing 1% Triton-X100  
598 (v/v) and solubilized by sonication. The supernatant (S100) was also supplemented with  
599 Triton-X100, to a final concentration of 1%. The subcellular fractionation experiment was not  
600 repeated as it was also performed in Brumm et al. (2020) and no unexpected result was  
601 obtained here.

602

603 *Sample preparation for mobility shift assay in SDS-PAGE*

604 Soluble protein extracts were prepared similar to immunoprecipitation experiments, frozen in  
605 liquid N<sub>2</sub> and stored at -80°C until further use. At the time of loading on SDS-PAGE, protein  
606 extracts were thawed on ice, mixed 1:1 with Laemmli buffer with or without reducing agent  
607 (5% β-mercaptoethanol, BME; Carl Roth catalogue no 4227.3, or dithiothreitol, DTT; Carl  
608 Roth catalogue no 6908.1) and boiled at 95°C for 5min.

609

610 *SDS-PAGE and protein gel blotting*

611 SDS-PAGE gel electrophoresis and protein gel blotting with PVDF membranes (Thermo  
612 Scientific catalogue no 88520) were performed as described (Lauber et al., 1997). All  
613 antibodies were diluted in 5% milk/TBS-T solution. Antibodies and dilutions: mouse anti-c-  
614 Myc mAB 9E10 (Santa Cruz Biotechnology catalogue no sc-40), 1:1000; mouse anti-GFP  
615 (Roche catalogue no 11814460001), 1:2500; mouse anti-LexA mAb C-11 (Santa Cruz  
616 Biotechnology sc-390386), 1:1000; POD-conjugated anti-HA (Roche catalogue no 2013819),  
617 1:4000; rabbit anti-SEC7<sup>GNOM</sup> (Steinmann et al., 1999), 1:2500; rabbit anti-SEC21 antiserum  
618 (Agrisera catalogue no AS08 327; Pimpl et al., 2000), 1:2000; anti-mouse (Sigma catalogue

619 no A2554) or anti-rabbit peroxidase-conjugated (Merck Millipore catalogue no AP307P) or  
620 alkaline phosphatase-conjugated antibodies (Jackson Immuno Research catalogue no 111-  
621 055-003), 1:5000. Detection was performed with the BM-chemiluminescence blotting  
622 substrate (Roche catalogue no 11500708001) and FusionFx7 imaging system (PeqLab).  
623 Image assembly was performed with Adobe Photoshop CS3.

624

## 625 **Acknowledgements**

626 We thank Marika Kientz for expert technical assistance and discussions, and Steffen Lau for  
627 the initial cloning of the DCB domain of GNL1 in the yeast B42 vector. This study was  
628 funded by the Deutsche Forschungsgemeinschaft (grant SFB1101/TPA01 to G.J.).

629

630

## 631 **Competing interests**

632 The corresponding author declares on behalf of all authors that there are no financial and  
633 non-financial competing interests.

634

635

## 636 **References**

637 Anders N, Jürgens G (2008) Large ARF guanine nucleotide exchange factors in membrane  
638 trafficking. *Cell Mol Life Sci* **65**: 3433-3445. doi: 10.1007/s00018-008-8227-7.

639 Anders N, Nielsen M, Keicher J, Stierhof YD, Furutani M, Tasaka M, Skriver K, Jürgens G  
640 (2008) Membrane association of the *Arabidopsis* ARF exchange factor GNOM involves  
641 interaction of conserved domains. *Plant Cell* **20**: 142-151. doi: 10.1105/tpc.107.056515.

642 Ashenberg O, Rozen-Gagnon K, Laub MT, Keating AE (2011) Determinants of  
643 homodimerization specificity in histidine kinases. *J Mol Biol* **413**: 222-235. DOI:

644 10.1016/j.jmb.2011.08.011.

645 Brumm S, Singh MK, Nielsen ME, Richter S, Beckmann H, Stierhof YD, Fischer AM,

646 Kumaran M, Sundaresan V, Jürgens G (2020) Coordinated activation of ARF1 GTPases

- 647 by ARF-GEF GNOM dimers is essential for vesicle trafficking in Arabidopsis. *Plant Cell*  
648 **32**: 2491-2507. doi: 10.1105/tpc.20.00240.
- 649 Bui QT, Golinelli-Cohen MP, Jackson CL (2009) Large Arf1 guanine nucleotide exchange  
650 factors: evolution, domain structure, and roles in membrane trafficking and human  
651 disease. *Mol Genet Genomics* **282**: 329-350. doi: 10.1007/s00438-009-0473-3.
- 652 Busch, M., Mayer, U., & Jürgens, G. (1996) Molecular analysis of the *Arabidopsis* pattern-  
653 formation gene *GNOM*: gene structure and intragenic complementation. *Molec Gen*  
654 *Genet* **250**: 681-691. doi: 10.1007/BF02172979.
- 655 Casanova JE (2007) Regulation of Arf activation: the Sec7 family of guanine nucleotide  
656 exchange factors. *Traffic* **8**: 1476-1485. doi: 10.1111/j.1600-0854.2007.00634.x.
- 657 Cox R, Mason-Gamer RJ, Jackson CL, Segev N (2004) Phylogenetic analysis of Sec7-  
658 domain-containing Arf nucleotide exchangers. *Mol Biol Cell* **15**: 1487–1505. DOI:  
659 10.1091/mbc.e03-06-0443.
- 660 Geldner N, Anders N, Wolters H, Keicher J, Kornberger W, Muller P, Delbarre A, Ueda T,  
661 Nakano A, Jürgens G (2003) The Arabidopsis GNOM ARF-GEF mediates endosomal  
662 recycling, auxin transport, and auxin-dependent plant growth. *Cell* **112**: 219-230. doi:  
663 10.1016/s0092-8674(03)00003-5.
- 664 Geldner, N, Richter S, Vieten A, Marquardt S, Torres-Ruiz RA, Mayer U, Jürgens G (2004)  
665 Partial loss-of-function alleles reveal a role for *GNOM* in auxin transport-related, post-  
666 embryonic development of *Arabidopsis*. *Development* **131**: 389-400. doi:  
667 10.1242/dev.00926.
- 668 Grebe M, Gadea J, Steinmann T, Kientz M, Rahfeld JU, Salchert K, Koncz C, Jürgens G  
669 (2000) A conserved domain of the *Arabidopsis* GNOM protein mediates subunit  
670 interaction and cyclophilin 5 binding. *Plant Cell* **12**: 343-356. doi: 10.1105/tpc.12.3.343.
- 671 Hochberg GKA Shepherd DA, Marklund EG, Santhanagoplan I, Degiacomi MT, Laganowsky  
672 A, Allison TM, Basha E, Marty MT, Galpin MR, Struwe WB, Baldwin AJ, Vierling E,  
673 Benesch JLP (2018) Structural principles that enable oligomeric small heat-shock protein

- 674       paralogs to evolve distinct functions. *Science* **359**: 930-935. doi:  
675       10.1126/science.aam7229.
- 676   Lauber, M, Waizenegger I, Steinmann T, Schwarz H, Mayer U, Hwang I, Lukowitz W,  
677       Jürgens G (1997) The *Arabidopsis* KNOLLE protein is a cytokinesis-specific syntaxin. *J*  
678       *Cell Biol* **139**: 1485-1493. doi: 10.1083/jcb.139.6.1485.
- 679   Marchant A, Cisneros AF, Dubé AK, Gagnon-Arsenault I, Ascencio D, Jain H, Aubé S,  
680       Eberlein C, Evans-Yamamoto D, Yachie N, Landry CR (2019) The role of structural  
681       pleiotropy and regulatory evolution in the retention of heteromers of paralogs. *Elife* **8**:  
682       e46754. doi: 10.7554/eLife.46754.
- 683   Marsh JA, Teichmann SA (2015) Structure, dynamics, assembly, and evolution of protein  
684       complexes. *Annu Rev Biochem* **84**: 551–575. doi: 10.1146/annurev-biochem-060614-  
685       034142.
- 686   Mossessova E, Corpina RA, Goldberg J (2003) Crystal structure of ARF1\*Sec7 complexed  
687       with Brefeldin A and its implications for the guanine nucleotide exchange mechanism. *Mol*  
688       *Cell* **12**: 1403-1411. DOI: 10.1016/s1097-2765(03)00475-1.
- 689   Mouratou B, Biou V, Joubert A, Cohen J, Shields DJ, Geldner N, Jürgens G, Melançon P,  
690       Cherfils J (2005) The domain architecture of large guanine nucleotide exchange factors  
691       for the small GTP-binding protein Arf. *BMC Genom* **6**: 20. doi: 10.1186/1471-2164-6-20.
- 692   Müller, A, Guan C, Gälweiler L, Tänzler P, Huijser P, Marchant A, Parry G, Bennett M,  
693       Wisman E, Palme K (1998) AtPIN2 defines a locus of *Arabidopsis* for root gravitropism  
694       control. *EMBO J* **17**: 6903-6911. doi: 10.1093/emboj/17.23.6903.
- 695   Natan E, Endoh T, Haim-Vilmovsky L, Flock T, Chalancon G, Hopper JTS, Kintses B,  
696       Horvath P, Daruka L, Fekete G, Pál C, Papp B, Osz E, Magyar Z, Marsh JA, Elcock AH,  
697       Babu MM, Robinson CV, Sugimoto N, Teichmann SA (2018) Cotranslational protein  
698       assembly imposes evolutionary constraints on homomeric proteins. *Nat Struct Mol Biol*  
699       **25**: 279-288. doi: 10.1038/s41594-018-0029-5.

- 700 Natan E, Wells JN, Teichmann SA, Marsh JA (2017) Regulation, evolution and  
701 consequences of cotranslational protein complex assembly. *Curr Opin Struct Biol* **42**: 90-  
702 97. DOI: 10.1016/j.sbi.2016.11.023.
- 703 Pimpl, P, Movafeghi A, Coughlan S, Denecke J, Hillmer S, Robinson DG (2000) In situ  
704 localization and in vitro induction of plant COPI-coated vesicles. *Plant Cell* **12**: 2219-2236.  
705 doi: 10.1105/tpc.12.11.2219.
- 706 Pipaliya SV, Schlacht A, Klinger CM, Kahn RA, Dacks J (2019) Ancient complement and  
707 lineage-specific evolution of the Sec7 ARF GEF proteins in eukaryotes. *Mol Biol Cell* **30**:  
708 1846-1863. DOI: 10.1091/mbc.E19-01-0073.
- 709 Ramaen O, Joubert A, Simister P, Belgareh-Touzé N, Olivares-Sanchez MC, Zeeh JC,  
710 Chantalat S, Golinelli-Cohen MP, Jackson CL, Biou V, Cherfils J (2007) Interactions  
711 between conserved domains within homodimers in the BIG1, BIG2, and GBF1 Arf  
712 guanine nucleotide exchange factors. *J Biol Chem* **282**: 28834-28842. doi:  
713 10.1074/jbc.M705525200.
- 714 Renault L, Guibert B, Cherfils J (2003) Structural snapshots of the mechanism and inhibition  
715 of a guanine nucleotide exchange factor. *Nature* **426**: 525-530. doi: 10.1038/nature02197.
- 716 Richter S, Geldner N, Schrader J, Wolters H, Stierhof YD, Rios G, Koncz C, Robinson DG,  
717 Jürgens G (2007) Functional diversification of closely related ARF-GEFs in protein  
718 secretion and recycling. *Nature* **448**: 488-492. doi: 10.1038/nature05967.
- 719 Richter S, Müller LM, Stierhof YD, Mayer U, Takada N, Kost B, Vieten A, Geldner N, Koncz  
720 C, Jürgens G (2011) Polarized cell growth in Arabidopsis requires endosomal recycling  
721 mediated by GBF1-related ARF exchange factors. *Nat Cell Biol* **14**: 80-86. doi:  
722 10.1038/ncb2389.
- 723 Singh, M. K, Krüger F, Beckmann H, Brumm S, Vermeer JEM, Munnik T, Mayer U, Stierhof  
724 YD, Grefen C, Schumacher K, Jürgens G (2014) Protein delivery to vacuole requires  
725 SAND protein-dependent Rab GTPase conversion for MVB-vacuole fusion. *Curr Biol* **24**:  
726 1383-1389. doi: 10.1016/j.cub.2014.05.005.

727 Steinmann T, Geldner N, Grebe M, Mangold S, Jackson CL, Paris S, Gälweiler L, Palme K,  
728 Jürgens G (1999) Coordinated polar localization of auxin efflux carrier PIN1 by GNOM  
729 ARF GEF. *Science* **286**: 316-318. doi: 10.1126/science.286.5438.316.

730 Teh OK, Moore I (2007) An ARF-GEF acting at the Golgi and in selective endocytosis in  
731 polarized plant cells. *Nature* **448**: 493-496. doi: 10.1038/nature06023.

732 Wells JN, Bergendahl LT, Marsh JA (2015) Co-translational assembly of protein complexes.  
733 *Biochem Soc Trans* **43**: 1221-1226. doi: 10.1042/BST20150159.

734

735

### 736 **Author Contributions**

737 SB, MKS, HB, SR and GJ conceived the idea and designed the experiments. SB, MKS, HB,  
738 SR, KH, TK, SBa, CK, HW and ST performed the experiments. SB, MKS, TK, HW and ST  
739 cloned constructs for in-vivo analysis, generated transgenic lines and performed genetic  
740 analyses. SB performed microscopic imaging analyses, MKS analysed protein interaction by  
741 co-immunoprecipitation, and HB, MKS, TK and SBa performed yeast two-hybrid interaction  
742 studies. SB and GJ wrote the manuscript with input from all authors.

743

744

### 745 **Figure legends**

746

747 **Figure 1. Paralogous ARF-GEFs GNOM and GNL1 – no heteromer formation but**  
748 **domain interaction**

749 **(A-C)** In-planta co-immunoprecipitation interaction assays of full-length proteins. IN, input;  
750 IP, immunoprecipitate.

751 Proteins were separated by SDS-PAGE and probed with specific antisera (IB; right); protein  
752 sizes in kDa (left).

753 **(A)** Interaction of GNOM-Myc with GNOM-HA. GNOM-Myc, negative control.

754 **(B)** Interaction of GNL1<sup>LM</sup>-Myc with GNL1-YFP but no GNOM-GNL1 interaction. GNL1<sup>LM</sup>-  
755 Myc, negative control. GNL1<sup>LM</sup>, engineered BFA-sensitive variant of GNL1 (Richter et al.,  
756 2007).  
757 **(C)** Cell fractionation and co-IP of differently tagged GNL1 from Arabidopsis seedlings. S10,  
758 S100, P100, supernatants and pellet from centrifugation at 10,000 x *g* and 100,000 x *g*.  
759 GNOM-GFP x GNOM-Myc, positive control; GNL1<sup>LM</sup>-Myc, negative control.  
760 **(D-H)** Quantitative yeast two-hybrid interaction assays of DCB domain  
761 **(D)** Diagram of domain organisation of ARF-GEFs GNOM and GNL1. The DCB<sup>GNOM</sup> domain  
762 spans aa1-246, the complementary  $\Delta$ DCB<sup>GNOM</sup> fragment (comprising domains HUS, SEC7,  
763 HDS1, HDS2 and HDS3) spans aa232-1451.  
764 **(E)** Both DCB<sup>GNOM</sup> and DCB<sup>GNL1</sup> interacted with  $\Delta$ DCB<sup>GNL1</sup> and  $\Delta$ DCB<sup>GNOM</sup>.  
765 **(F, G)** Interaction of **(F)** DCB<sup>GNOM</sup> and **(G)** DCB<sup>GNL1</sup> with wild-type  $\Delta$ DCB<sup>GNOM</sup>. Both DCB  
766 domains failed to interact with  $\Delta$ DCB<sup>GNOM</sup> variants bearing HUS box ( $\Delta$ DCB<sup>GNOM-NYDC</sup>) or  
767 G<sub>579</sub>R mutation ( $\Delta$ DCB<sup>GNOM-B4049</sup>) or with a  $\Delta$ DCB<sup>GNOM</sup> fragment lacking the HUS domain  
768 (SEC7HDS123<sup>GNOM</sup>).  
769 **(H)** DCB<sup>GNL1</sup> did not interact with itself, unlike DCB<sup>GNOM</sup>, nor with DCB<sup>GNOM</sup>.

770

## 771 **Figure 2. Interaction behaviour and functionality of C-to-S substitution mutants**

772 **(A-B)** Redox-dependent GNOM and GNL1 dimer detection

773 **(A)** Apparent dimers of GNOM and GNL1 detected in Western blots under non-reducing  
774 conditions (BME,  $\beta$ -mercaptoethanol).

775 **(B)** Band shift to monomer size in 5 mM or more dithiothreitol (DTT), suggesting involvement  
776 of cysteine bridges in stabilising the dimers.

777 **(C-G)** Interaction behaviour of GNOM with C-to-S substitutions (GNOM<sup>CS</sup>)

778 **(C)** Positions of C residues and their C-to-S substitutions indicated in DCB domain of wild-  
779 type and 3CS, 4CS, 7CS and 1CS mutant GNOM proteins.

780 **(D-E)** Yeast two-hybrid interaction assays. **(D)** None of the mutant DCB<sup>GNOM</sup> domains  
781 interacted with itself or with wild-type DCB<sup>GNOM</sup> domain. **(E)** DCB<sup>GNOM-3CS</sup> and DCB<sup>GNOM-1CS</sup>  
782 interacted with the  $\Delta$ DCB<sup>GNOM</sup> fragment, like wild-type DCB<sup>GNOM</sup> and in contrast to the other  
783 two C>S substitution mutants. BD, DNA-binding domain; AD, activation domain.  
784 **(F)** GNOM<sup>3CS</sup> formed homodimers detectable under non-reducing conditions, although the  
785 dimer-representing bands appeared abnormal.  
786 **(G)** Co-immunoprecipitation analysis of GNOM<sup>3CS</sup>-YFP and GNL1-Myc from transgenic  
787 Arabidopsis seedling extract.

788

789 **Figure 3. Developmental phenotypes and GNOM-GNL1 interaction in *gnom<sup>sgt</sup>* deletion**  
790 **mutants rescued by DCB<sup>GNL1</sup>: $\Delta$ DCB<sup>GNOM</sup> chimeric protein or  $\Delta$ DCB<sup>GNOM</sup> fragment**

791 **(A-C)** DCB<sup>GNL1</sup>: $\Delta$ DCB<sup>GNOM</sup> protein. **(A)** Lateral root development and **(B)** root gravitropism  
792 normal in the absence of BFA and partially resistant to BFA due to interaction with BFA-  
793 resistant GNL1. Controls: Col-0, wild-type; GNOM<sup>ML</sup>-Myc, BFA-resistant GNOM. 10 $\mu$ M BFA.  
794 **(C)** Interaction of DCB<sup>GNL1</sup>: $\Delta$ DCB<sup>GNOM</sup>-Myc chimeric protein with both GNOM-GFP (*left*) and  
795 GNL1-YFP (*middle*). Heterotrimer (*right*) with DCB<sup>GNL1</sup>: $\Delta$ DCB<sup>GNOM</sup>-Myc acting as a bridge  
796 between GNOM-HA and GNL1-YFP.

797 **(D-F)** HA-tagged or Myc-tagged  $\Delta$ DCB<sup>GNOM</sup> protein. **(D)** No lateral root development.  
798 Controls: Col-0, wild-type; GNOM<sup>ML</sup>-Myc, BFA-resistant GNOM. **(E)** Root gravitropism  
799 normal in the absence of BFA and nearly fully resistant to BFA due to interaction with BFA-  
800 resistant GNL1. Controls: Col-0, wild-type; GNOM<sup>ML</sup>-Myc, BFA-resistant GNOM. 10 $\mu$ M BFA.

801 **(F)** GNOM without DCB domain ( $\Delta$ DCB<sup>GNOM</sup>-HA) interacting with GNL1-Myc in *gnom<sup>sgt</sup>*  
802 homozygous background.

803 **(C, F)** Protein extracts of Arabidopsis seedlings expressing differently tagged proteins were  
804 subjected to co-immunoprecipitation analysis. Total extracts (IN) and immunoprecipitates  
805 (IP) were separated by SDS-PAGE and probed with specific antisera (IB) indicated on the  
806 right; protein sizes are given in kDa on the left.



807

808 **Figure 4. Subcellular relocation of Golgi-associated GNL1 to endosomes by**

809 **interaction with  $\Delta$ DCB<sup>GNOM</sup>**

810 Seedlings expressing (A-H, M-T) GNL1-YFP or (I-L) GNOM-GFP were treated with 50  $\mu$ M  
811 BFA for 1 h before fixation and immunostaining with anti-ARF1 antiserum (A-L, magenta) or  
812 anti- $\gamma$ COP antiserum (M-T, magenta). Line scans (right panels) as indicated by the white  
813 lines in the adjacent panels.

814 GNOM genotypes: (A-D, I-L, Q-T) wild-type; (E-H, M-P) *sgt* (GNOM and 4 adjacent genes  
815 on either side deleted) expressing  $\Delta$ DCB<sup>GNOM</sup>. Note shift of GNL1 from  $\gamma$ COP-positive Golgi  
816 stacks to ARF1-positive BFA compartment caused by absence of DCB<sup>GNOM</sup>.

817

818 **Figure 5. Role of DCB domain in GNOM dimer formation and GNOM-GNL1 interaction**

819 **(model)**

820 (A) Stepwise GNOM dimer formation during translation. Interaction between two N-terminal  
821 DCB domains initiates dimer formation. The pair of fully translated proteins undergoes two  
822 DCB- $\Delta$ DCB interactions followed by the formation of stabilising Cys bridges (blue dots).

823 (B) GNOM-GNL1 interactions established after translation. GNL1 and a chimeric  
824 DCB<sup>GNL1</sup>: $\Delta$ DCB<sup>GNOM</sup> protein with GNOM function form dimers only mediated by DCB- $\Delta$ DCB  
825 interactions. Chimeric DCB<sup>GNL1</sup>: $\Delta$ DCB<sup>GNOM</sup> protein can also act as a bridge between GNOM  
826 and GNL1 that do not interact directly. GNL1 interacts with  $\Delta$ DCB<sup>GNOM</sup> but not the mutant  
827 variant  $\Delta$ DCB<sup>GNOM-B4049</sup> that cannot interact with the DCB domain.

828

829

830 **Figure Supplements and Supplementary Tables**

831

832 **Figure 1 – figure supplement 1. DCB-DCB interaction assays of GNOM-GNL1 chimeric**

833 **DCB domains**

834 Yeast two-hybrid assays revealed that the chimeric DCB domain #2 with aa1-144 from  
835 GNOM displayed nearly full interaction with DCB<sup>GNOM</sup> whereas the reciprocal chimera #3 lost  
836 most of its interaction activity.

837

838 **Figure 2 – figure supplement 1. Expression of transgenes in *gnom*<sup>sgt</sup> background**

839 **(A)** Protein extracts of *gnom*<sup>sgt</sup> mutant seedlings rescued by expression of different  
840 transgenes probed with anti-SEC7<sup>GNOM</sup> antiserum. Arrows indicate GNOM bands. The cross-  
841 reacting band at approx. 90 kDa serves as an internal control. The band representing Myc-  
842 tagged or HA-tagged  $\Delta$ DCB<sup>GNOM</sup> at 130 kDa overlaps with a cross-reacting band present in  
843 all samples.

844 **(B)** Protein extracts of *gnom*<sup>sgt</sup> mutant seedlings rescued by expression of YFP-tagged  
845 GNOM<sup>CS</sup> substitution variants probed with anti-GFP antibody. Loading control: band  
846 detected with anti-SEC21 antiserum.

847 **(C, D)** Protein extracts of *gnom*<sup>sgt</sup> mutant seedlings rescued by expression of (C) Myc-  
848 tagged or (D) HA-tagged  $\Delta$ DCB<sup>GNOM</sup>. Controls: *gnom*<sup>sgt</sup>, GNOM deletion; WT(Col-0), wild-  
849 type; GNOM-Myc *gnom*<sup>sgt</sup>, Myc-tagged full-length GNOM expressed in *gnom*<sup>sgt</sup> deletion  
850 background. Loading control: band detected with anti-SEC21 antiserum.

851

852 **Figure 2 – figure supplement 2. Rescue of *gnom*<sup>sgt</sup> mutant plants with C-to-S  
853 substitution variants of GNOM**

854 **(A)** Seedling phenotypes. Scale bars, 1 cm.

855 **(B, C)** Postembryonic phenotypes of GNOM<sup>CS</sup> transgenic plants: (B) rosette-stage plants on  
856 23 dag; (C) adult plants on 38 dag. Scale bars, 2 cm (B), 6 cm (C).

857 **(D)** PCR showing rescue of *gnom*<sup>sgt</sup> by different GN<sup>CS</sup>-YFP transgenes. Five seedlings from  
858 each line were genotyped using GN overtag primer.

859

860 **Figure 2 – figure supplement 3. Subcellular localisation of GNOM<sup>CS</sup> mutant proteins**

861 YFP-tagged GNOM<sup>CS</sup> proteins localised to BFA compartments stained with the endocytic  
862 tracer FM4-64 in root cells of seedlings treated with 50 µM BFA for 1h. GN-GFP (control) is  
863 in wild-type background and the YFP-tagged GNOM<sup>CS</sup> variants are in the *gnom<sup>sgt</sup>* deletion  
864 mutant background. Scale bars, 10 µm.

865

866 **Figure 2 – figure supplement 4. Interaction behaviour of GNOM<sup>4CS</sup>**

867 Protein extracts of transgenic seedlings expressing differently tagged GNOM, GNL1,  
868 GNOM<sup>4CS</sup> or GNOM<sup>3CS</sup> proteins were subjected to co-immunoprecipitation analysis with anti-  
869 GFP beads.

870 (A) GNOM<sup>4CS</sup> interacted with GNOM, but failed to interact with itself (GNOM<sup>4CS</sup>-YFP).

871 (B) GNOM<sup>4CS</sup> interacted with GNOM<sup>3CS</sup>, which reflects the ability of DCB<sup>GNOM-3CS</sup> to interact  
872 with ΔDCB<sup>GNOM</sup>, in contrast to the inability of DCB<sup>GNOM-4CS</sup> (see Figure 2E). IB, immunoblot  
873 detection; IN, input; IP, immunoprecipitate. Size markers on the left (in kDa).

874

875 **Figure 2 – figure supplement 5. Complementation of *gnom<sup>sgt</sup> gnl1* double knockout  
876 mutant with GNOM<sup>3CS</sup>**

877 Although GNOM<sup>3CS</sup> rescues development of the double knockout, giving rise to adult plants  
878 (A-C), the rescued double mutants are sterile as indicated by the small siliques without  
879 fertilised ovules (D). Col-0, wild-type control. Scale bar, 1 cm.

880

881 **Figure 3 – figure supplement 1. Postembryonic phenotypes of *gnom<sup>sgt</sup>* deletion  
882 mutant and *gnom<sup>sgt</sup> gnl1* double mutant rescued by expression of chimeric  
883 DCB<sup>GNL1:ΔDCB<sup>GNOM</sup></sup> or ΔDCB<sup>GNOM</sup> protein**

884 (A) Two independent DCB<sup>GNL1:ΔDCB<sup>GNOM</sup></sup> transgene insertions (#4-11 and #5-13) rescue the  
885 *gnom<sup>sgt</sup>* deletion mutant. *Top*: Three weeks old seedlings. Scale bars, 2 cm. *Bottom*: Six  
886 weeks old plants. Scale bars, 7 cm. Controls: Col-0, wild-type; Ler, wild-type (parental

887 genotype of *gnom<sup>sgt</sup>* deletion mutant); *b4049/emb30*, complementing non-functional *gnom*  
888 alleles.

889 **(B, C)** Rescue of *gnom<sup>sgt</sup> gnl1* double mutant by expression of Myc-tagged  
890 DCB<sup>GNL1</sup>: $\Delta$ DCB<sup>GNOM</sup> chimeric protein. Note strongly reduced stature of the rescued double  
891 mutant (**B**, middle; **C**, at higher magnification) as compared to the rescued *gnom<sup>sgt</sup>* single  
892 mutant (**B**, right). Ler, wild-type control. Scale bar, 7 cm.

893 **(D)** Differently tagged  $\Delta$ DCB<sup>GNOM</sup> transgenes are able to rescue the *gnom<sup>sgt</sup>* deletion mutant.  
894 *Top*: Three weeks old seedlings. Scale bars, 2cm. *Bottom*: Six weeks old plants. Scale bars,  
895 7 cm. Col-0, wild-type;  $\Delta$ DCB<sup>GNOM</sup>-HA *gnom<sup>sgt</sup>* and  $\Delta$ DCB<sup>GNOM</sup>-Myc *gnom<sup>sgt</sup>*, *gnom* deletion  
896 mutant expressing HA-tagged or Myc-tagged  $\Delta$ DCB<sup>GNOM</sup> fragment.

897

898 **Figure 3 – figure supplement 2. NAA-induced lateral root initiation in *gnom<sup>sgt</sup>***

899 **seedlings rescued by  $\Delta$ DCB<sup>GNOM</sup>**

900 **(A-J)** In Columbia wildtype (Col; **A-E**) and GNOM-Myc *gnom<sup>sgt</sup>* (**F-J**) controls, lateral root  
901 primordia formed after NAA treatment for 2 days (2d; **A-C, F-H**) or overnight (Ov; **D-E, I-J**).

902 **(K-X)** In contrast, loss of the DCB domain in GNOM ( $\Delta$ DCB<sup>GNOM</sup>-HA *gnom<sup>sgt</sup>*, **K-O**;

903  $\Delta$ DCB<sup>GNOM</sup>-Myc *gnom<sup>sgt</sup>*, **P-X**) disturbed lateral root formation. After NAA treatment for 2  
904 days (2d; **K-M, P-R, U-V**), some lateral root primordia formed, but were abnormally closely  
905 spaced (asterisks) and often pericycle cells strongly proliferated between primordia

906 (arrowhead) or along the whole root axis (arrows). Overnight treatment with NAA (Ov; **N-O**,

907 **S-T, W-X**) led to strong proliferation of pericycle cells while primordia were rarely detectable

908 (arrows). Scale bar, 100 $\mu$ m.

909

910

911 **Suppl. Table 1. Rescue of *gnom gnl1* double mutants by GNOM transgenes**

912 **(A) Pollen rescue**

913 **(B) Female gametophyte rescue**

914 F1 seedling progeny from reciprocal crosses of *sgt/sgt gnl1/GNL1* plants bearing the  
915 transgenes indicated with wild-type (Col) plants were genotyped for the *gnl1* T-DNA allele  
916 conferring hygromycin resistance (Hyg<sup>R</sup>) or the hygromycin-sensitive (Hyg<sup>S</sup>) *GNL1* wild-type  
917 allele by seed germination of hygromycin-containing agar plates. Myc and HA, protein tags  
918 detectable with specific antibodies.

919 <sup>a</sup> N, number of seedlings genotyped by PCR

920 <sup>b</sup> *sgt (gnom<sup>sgt</sup>)*, 37-kb deletion spanning *GNOM* and 4 flanking genes on either side (Brumm  
921 et al., 2020)

922 <sup>c</sup> Transmission of *gnl1* T-DNA allele through pollen reduced by about 40% (Richter et al.,  
923 2007)

924 <sup>d</sup> Transmission of mutant allele divided by transmission of wild-type allele

925 <sup>e</sup> GNOM-GFP protein accumulation at least 10-fold above endogenous GNOM level

926

## 927 **Suppl. Table 2. Rescue analysis of $\Delta DCB^{GNOM}$ transgene variants**

### 928 **(A) Analysis of *gnom<sup>sgt</sup> gnl1* rescuing activity of $\Delta DCB^{GNOM}$**

929 Analysis of  $\Delta DCB^{GNOM}$ -HA *sgt gnl1* mutant gametophyte viability by crossing wild-type (Col)  
930 plants with pollen hemizygous for the transgene in the segregating *gnom<sup>sgt</sup> gnl1* double  
931 mutant background. By PCR analysis, no mutant seedlings were doubly heterozygous for  
932 *gnom<sup>sgt</sup>* and *gnl1*. HA, protein tag detectable with specific antibody.

933 <sup>a</sup> N, number of seedlings genotyped by PCR

934 <sup>b</sup> *gnom<sup>sgt</sup> (sgt)*, 37-kb deletion spanning *GNOM* and 4 flanking genes on either side (Brumm  
935 et al., 2020)

936 <sup>c</sup> Transmission of *gnl1* T-DNA allele through pollen reduced by about 40% (Richter et al.,  
937 2007)

938 <sup>d</sup> Assuming independent segregation

939

### 940 **(B) Analysis of *gnom<sup>sgt</sup>* rescuing activity of $\Delta DCB^{GNOM-B4049}$**

941 PPT-resistant seedling progeny were analysed for wild-type and *gnom* mutant phenotypes  
942 on selection plates (PPT, phosphinotricine).  
943 *B4049*, G<sub>579</sub>R substitution interfering with DCB- $\Delta$ DCB interaction and membrane association  
944 of GNOM; XLIM, artificial dimerisation module from *Xenopus* (Anders et al., 2008); Myc,  
945 protein tag detectable with specific antibody.  
946  
947

A

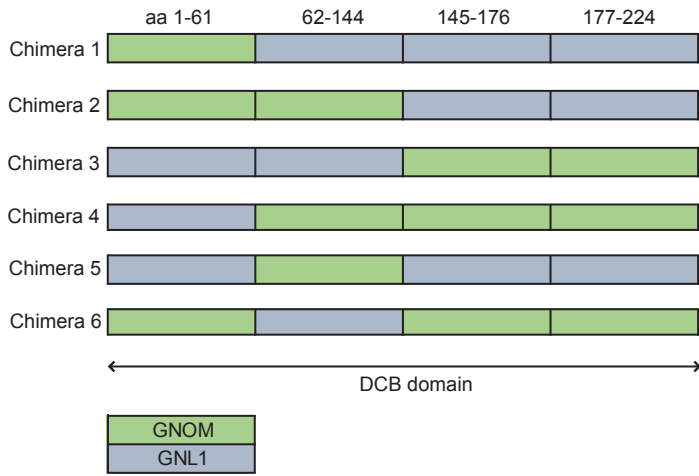

B

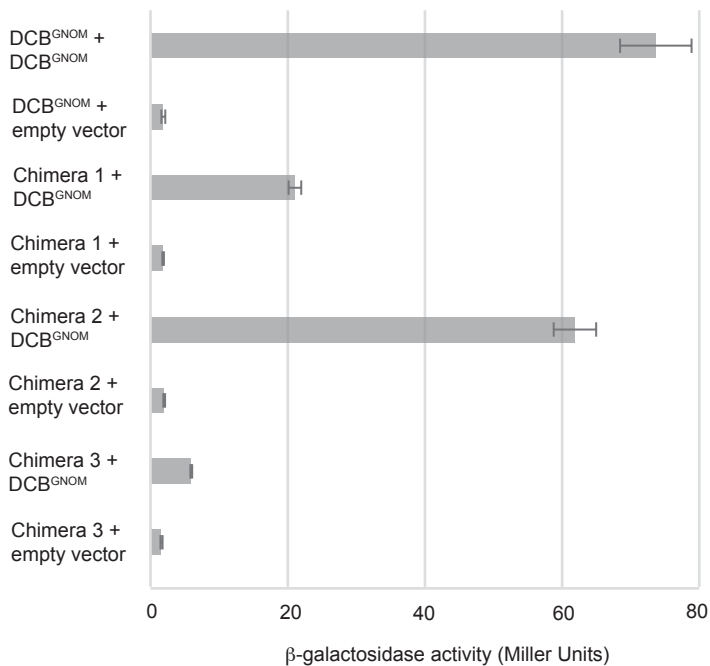

C

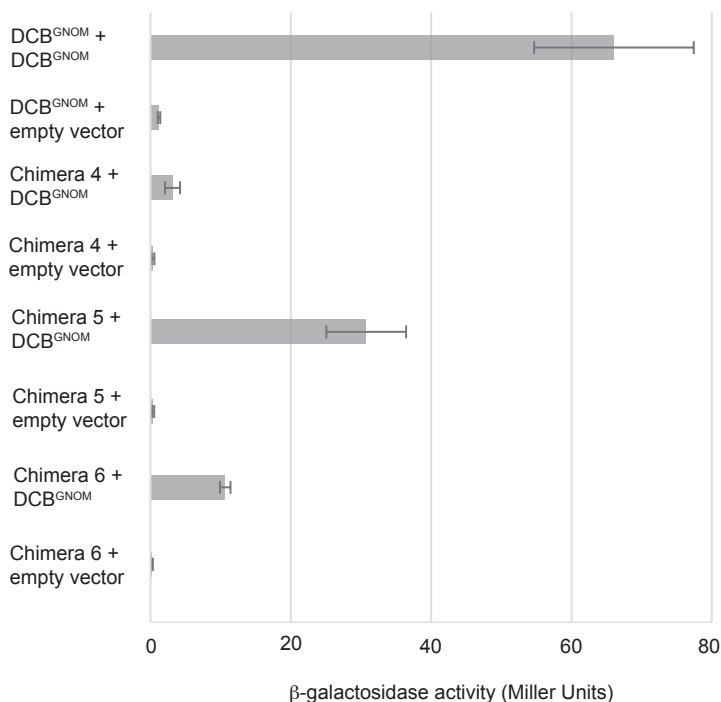

**Figure 1 – figure supplement 1. DCB-DCB interaction assays of GNOM-GNL1 chimeric DCB domains**  
Yeast two-hybrid assays revealed that the chimeric DCB domain #2 with aa1-144 from GNOM displayed nearly full interaction with DCB<sup>GNOM</sup> whereas the reciprocal chimera #3 lost most of its interaction activity.

A

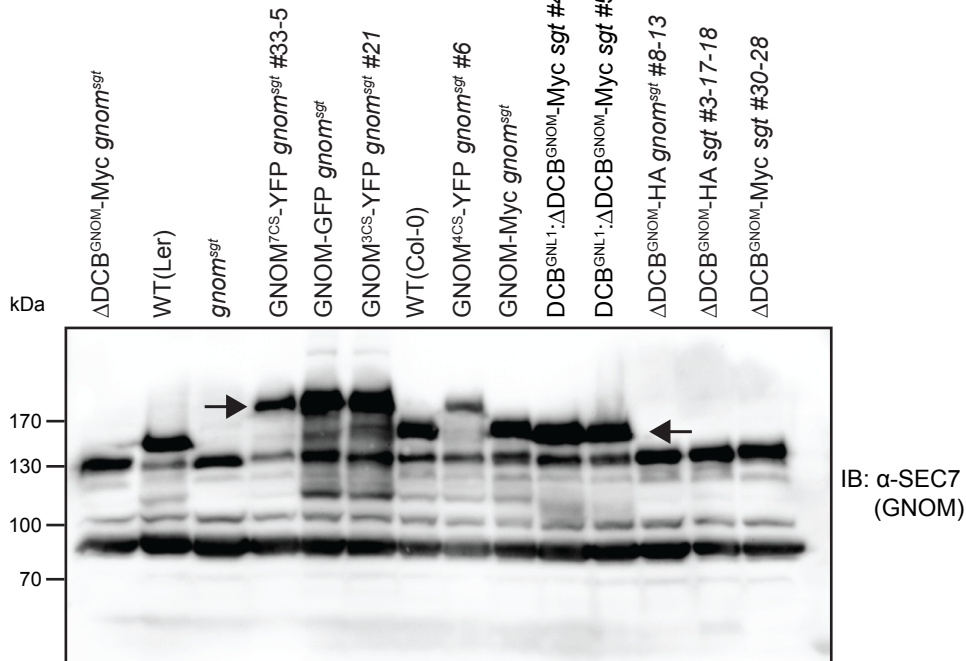

B

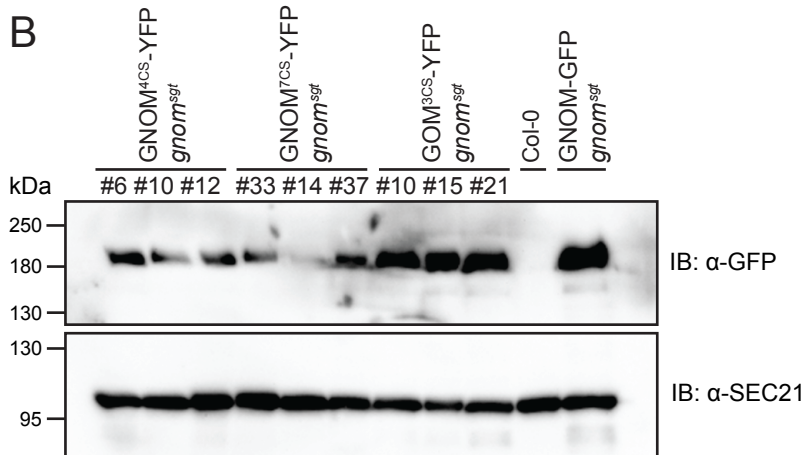

C

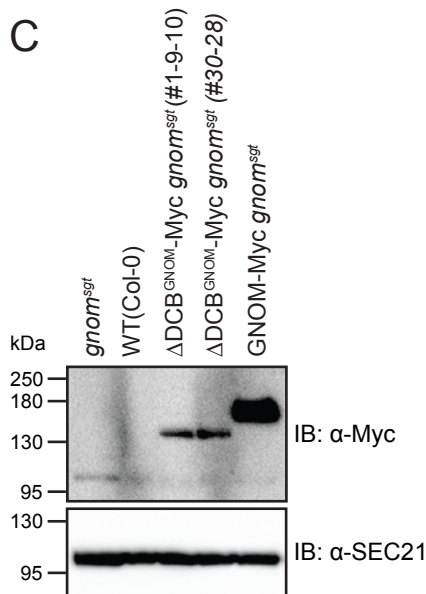

D

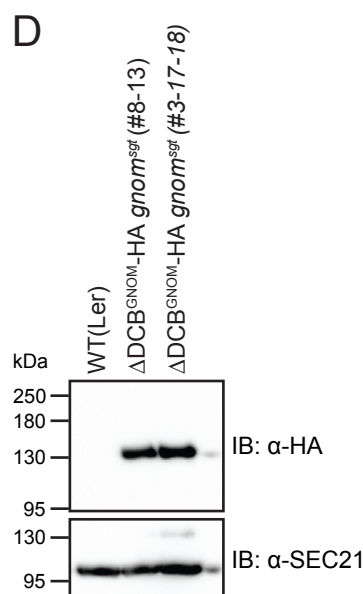

**Figure 2 – figure supplement 1. Expression of transgenes in *gnom*<sup>sgt</sup> background**

**(A)** Protein extracts of *gnom*<sup>sgt</sup> mutant seedlings rescued by expression of different transgenes probed with anti-SEC7<sup>GNOM</sup> antiserum. Arrows indicate GNOM bands. The cross-reacting band at approx. 90 kDa serves as an internal control. The band representing Myc-tagged or HA-tagged ΔDCB<sup>GNOM</sup> at 130 kDa overlaps with a cross-reacting band present in all samples.

**(B)** Protein extracts of *gnom*<sup>sgt</sup> mutant seedlings rescued by expression of YFP-tagged GNOM<sup>CS</sup> substitution variants probed with anti-GFP antibody. Loading control: band detected with anti-SEC21 antiserum.

**(C, D)** Protein extracts of *gnom*<sup>sgt</sup> mutant seedlings rescued by expression of **(C)** Myc-tagged or **(D)** HA-tagged ΔDCB<sup>GNOM</sup>. Controls: *gnom*<sup>sgt</sup>, GNOM deletion; WT (Col-0), wild-type; GNOM-Myc *gnom*<sup>sgt</sup>, Myc-tagged full-length GNOM expressed in *gnom*<sup>sgt</sup> deletion background. Loading control: band detected with anti-SEC21 antiserum.



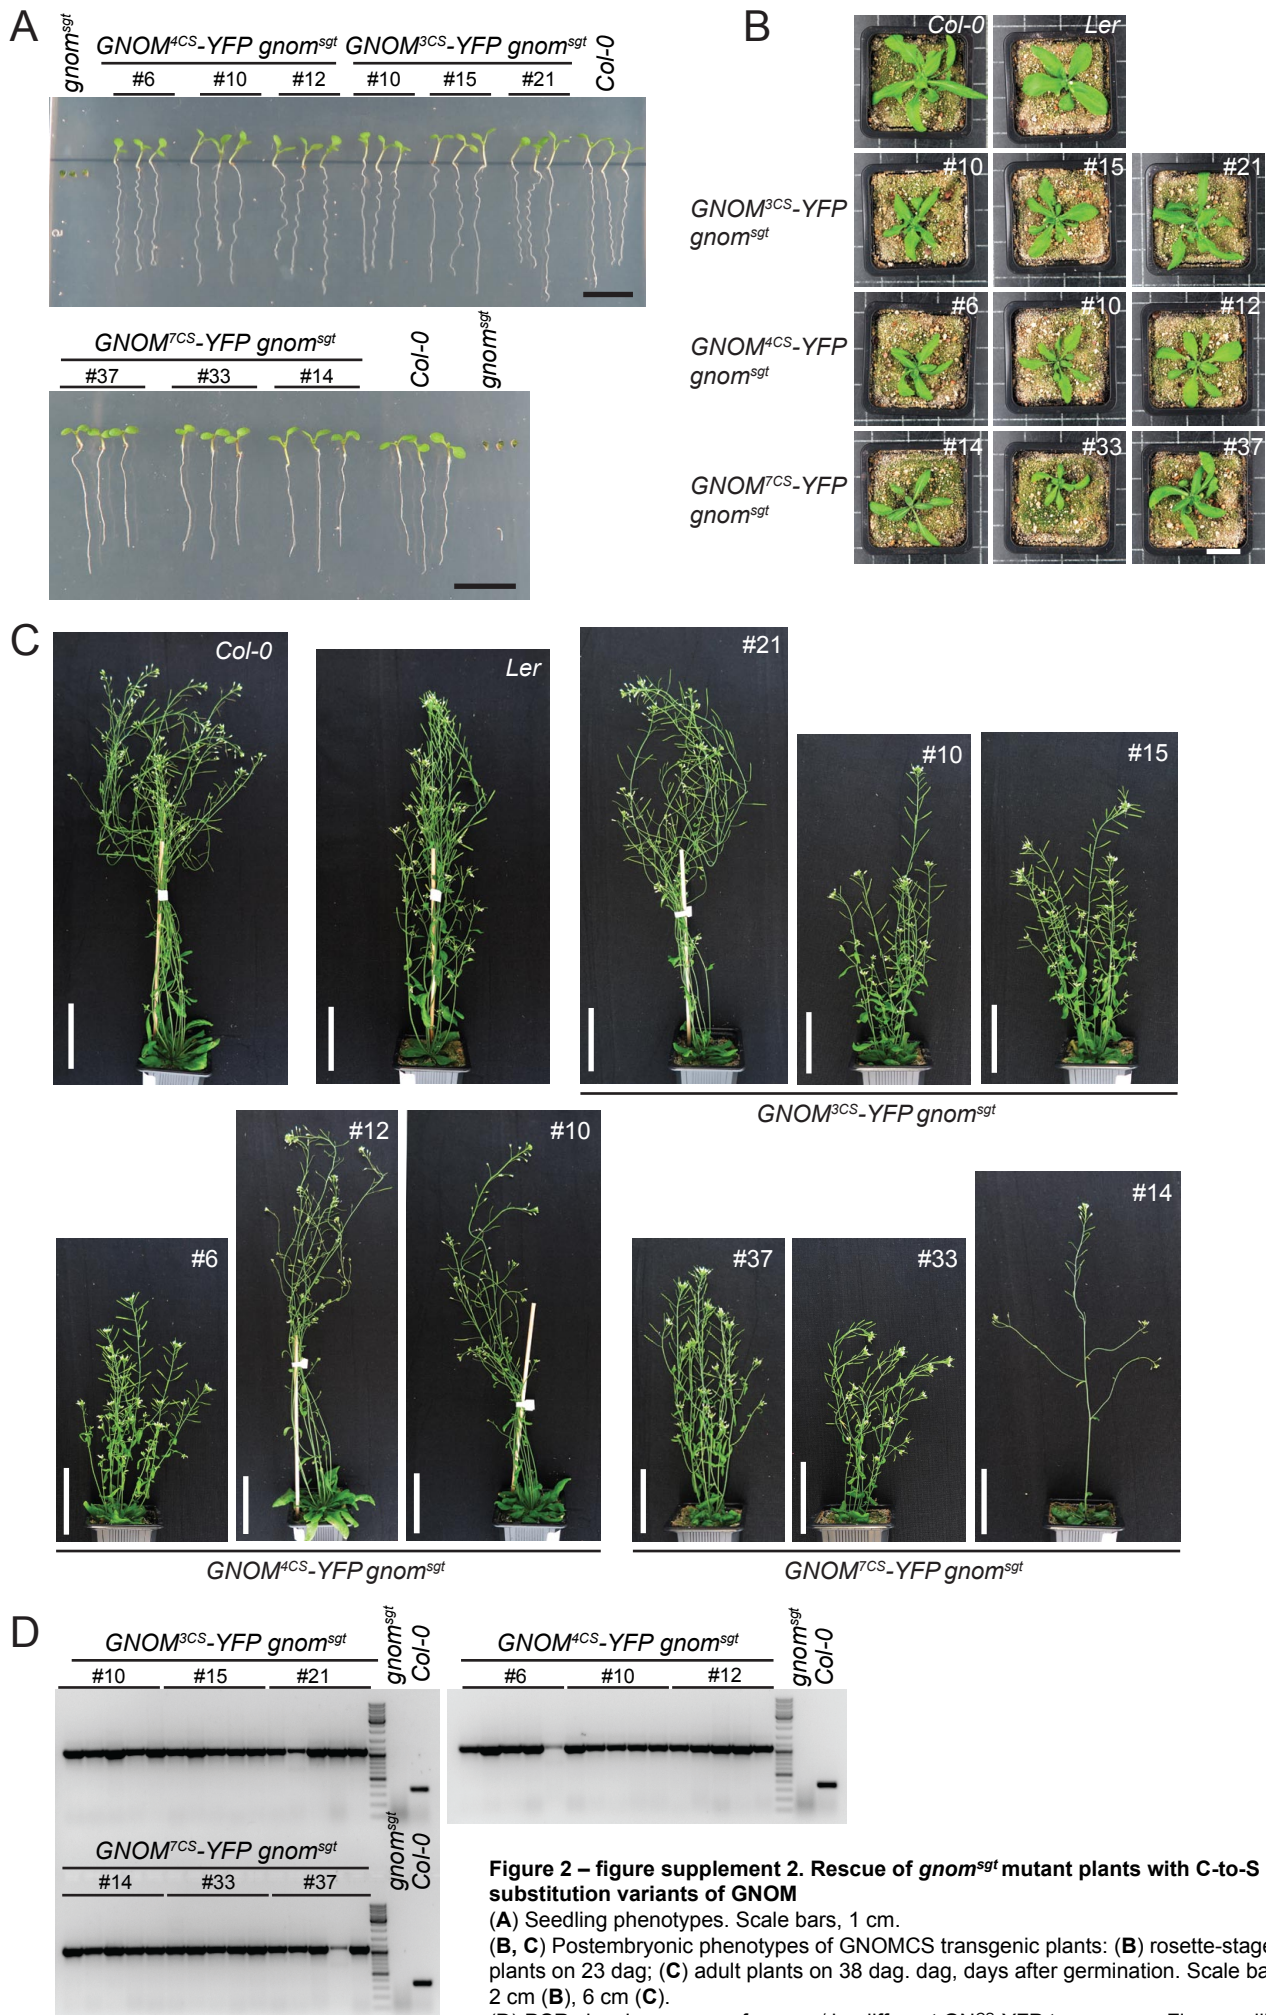

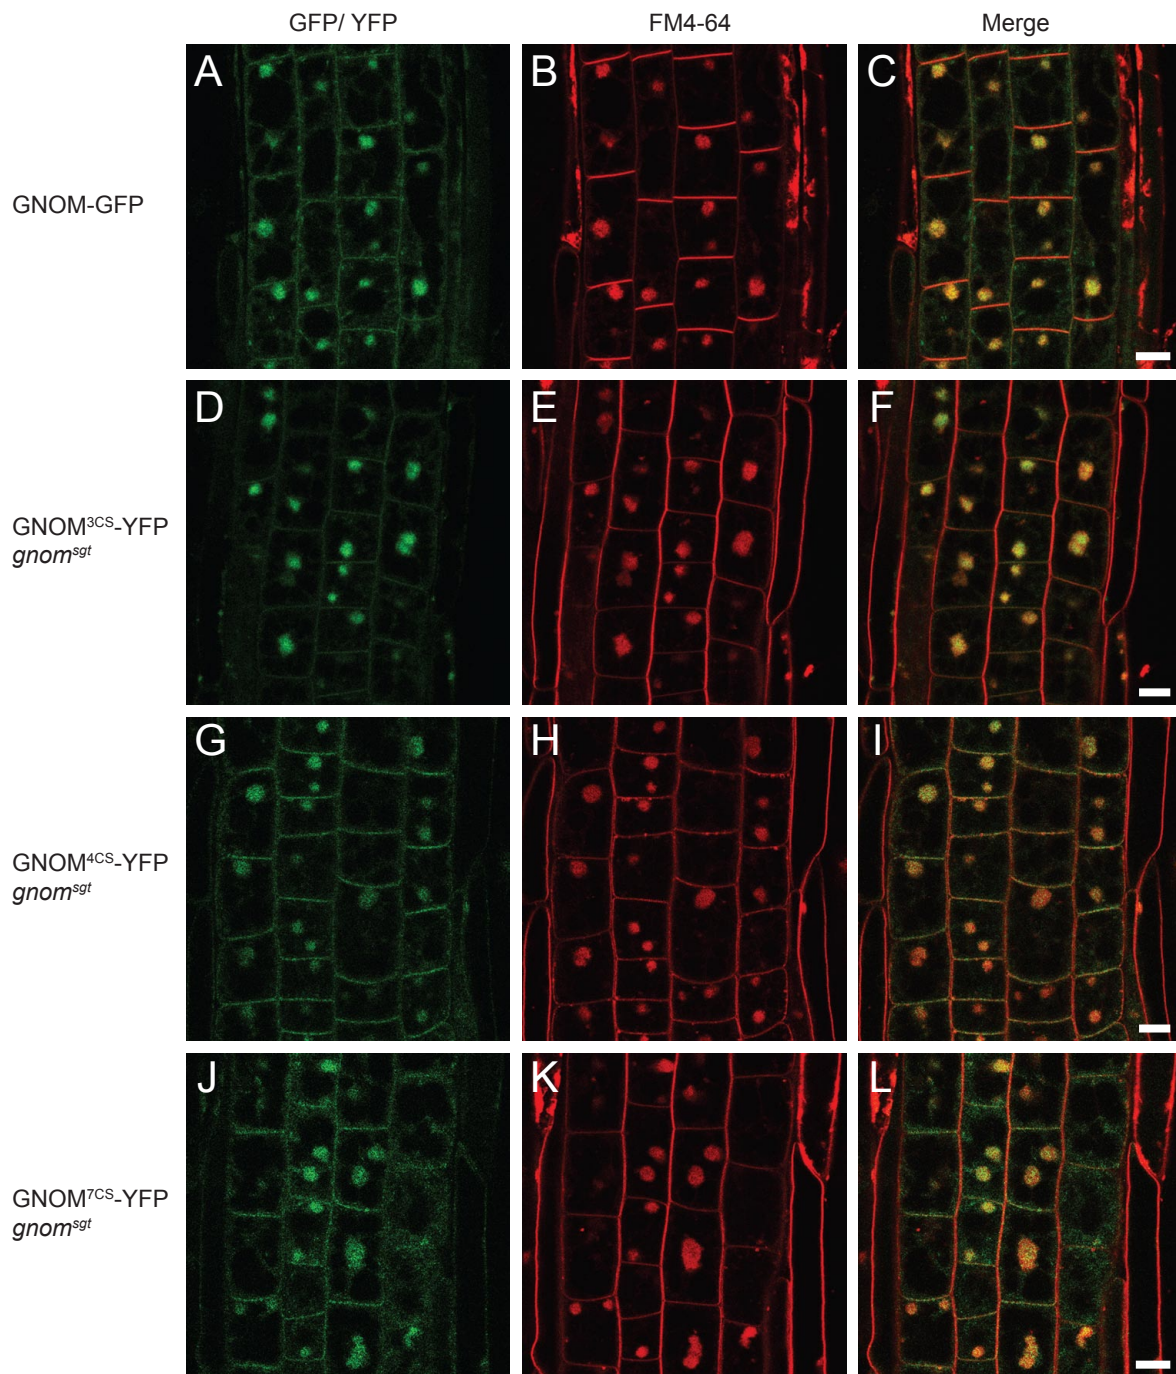

**Figure 2 – figure supplement 3. Subcellular localisation of GNOM<sup>CS</sup> mutant proteins**

YFP-tagged GNOM<sup>CS</sup> proteins localised to BFA compartments stained with the endocytic tracer FM4-64 in root cells of seedlings treated with 50  $\mu$ M BFA for 1h. GN-GFP (control) is in wild-type background and the YFP-tagged GNOM<sup>CS</sup> variants are in the *gnom<sup>sgt</sup>* deletion mutant background. Scale bars, 10  $\mu$ m.

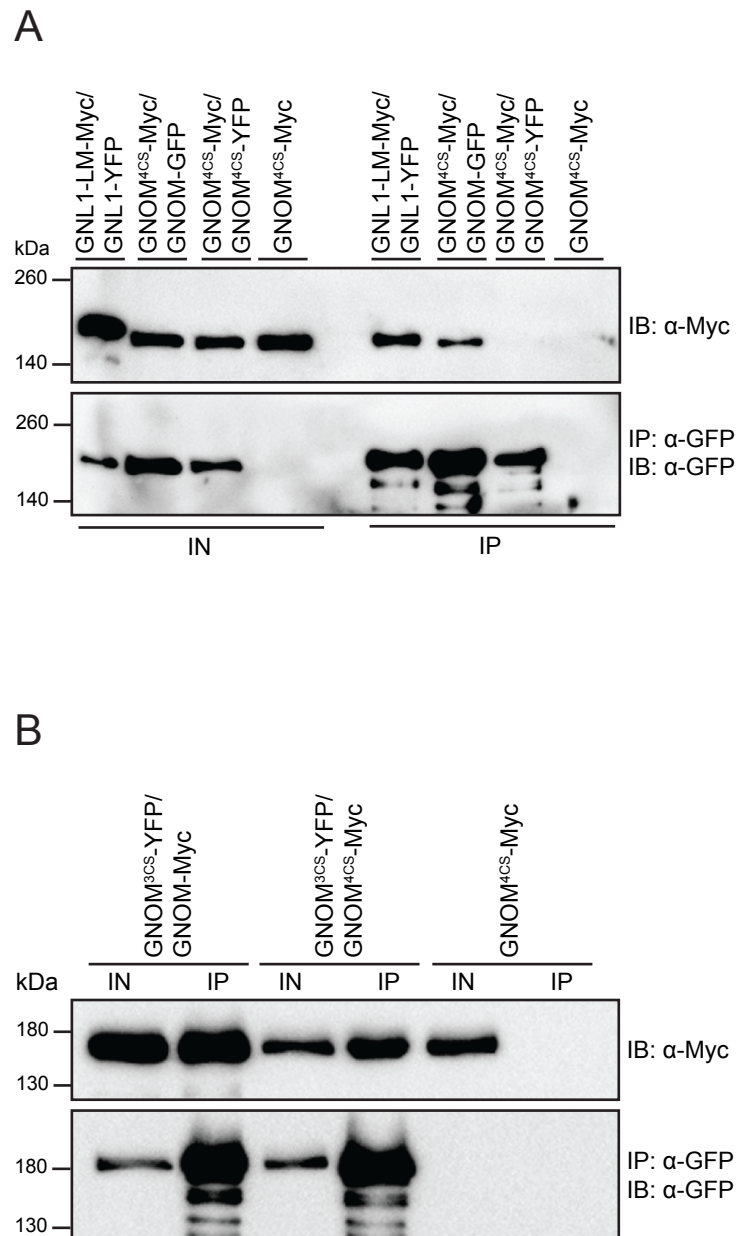

**Figure 2 – figure supplement 4. Interaction behaviour of GNOM<sup>4CS</sup>**

Protein extracts of transgenic seedlings expressing differently tagged GNOM, GNL1, GNOM<sup>4CS</sup> or GNOM<sup>3CS</sup> proteins were subjected to co-immunoprecipitation analysis with anti-GFP beads.

(A) GNOM<sup>4CS</sup> interacted with GNOM, but failed to interact with itself (GNOM<sup>4CS</sup>-YFP).

(B) GNOM<sup>4CS</sup> interacted with GNOM<sup>3CS</sup>, which reflects the ability of DCB<sup>GNOM-3CS</sup> to interact with  $\Delta$ DCB<sup>GNOM</sup>, in contrast to the inability of DCB<sup>GNOM-4CS</sup> (see Figure 2E). IB, immunoblot detection; IN, input; IP, immunoprecipitate. Size markers on the left (in kDa).

A

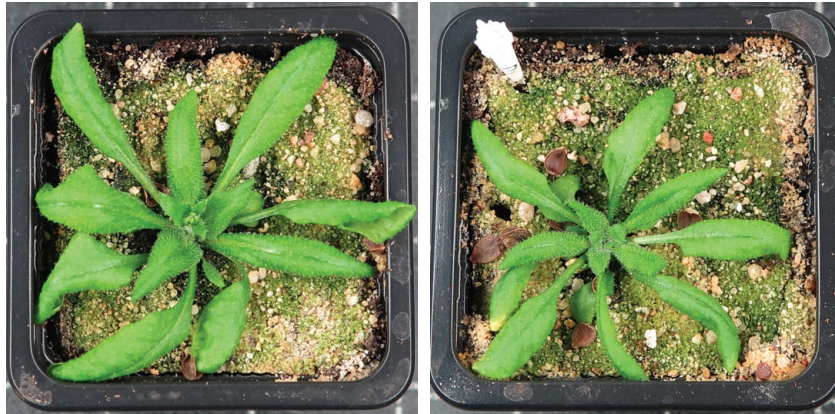

Col-0

*GNOM<sup>3CS</sup>-YFP#21 gnom<sup>sgt</sup> gnl1*

B

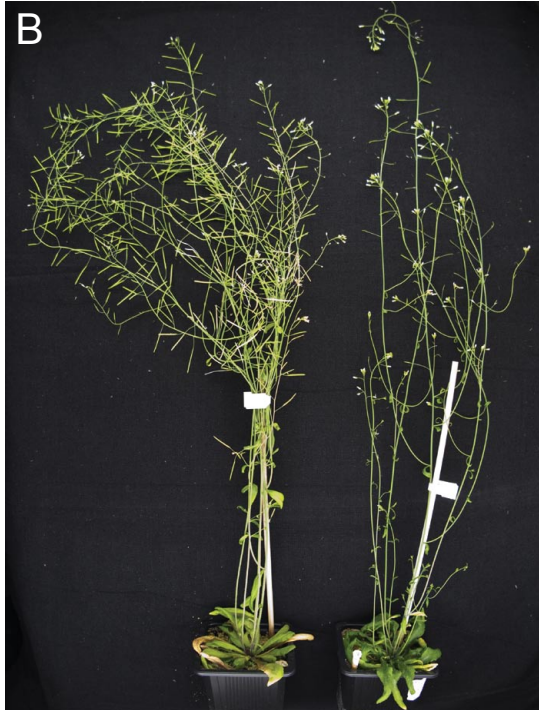

Col-0

*GNOM<sup>3CS</sup>-YFP#21  
gnom<sup>sgt</sup> gnl1*

C

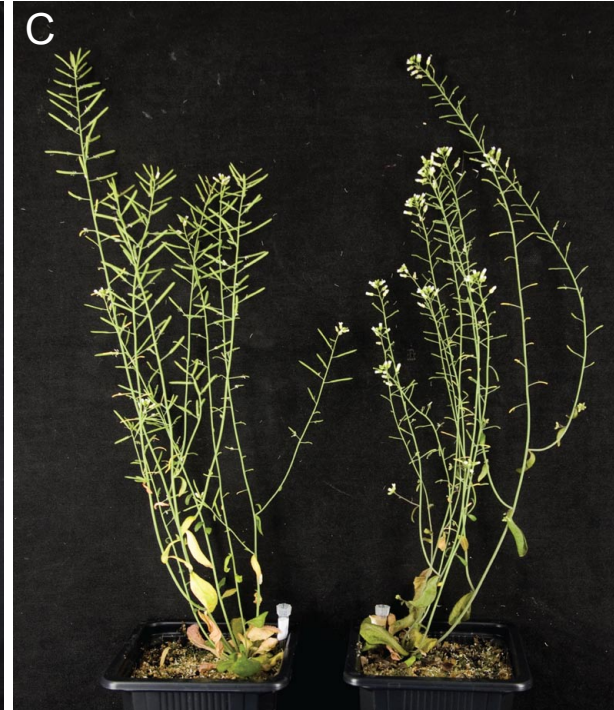

*GNOM<sup>3CS</sup>-YFP #15  
gnom<sup>sgt</sup> gnl1/GNL1*

*GNOM<sup>3CS</sup>-YFP #15  
gnom<sup>sgt</sup> gnl1*

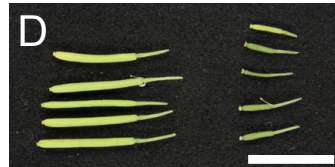

*GNOM<sup>3CS</sup>-YFP gnom<sup>sgt</sup> gnl1/GNL1* *GNOM<sup>3CS</sup>-YFP gnom<sup>sgt</sup> gnl1*

**Figure 2 – figure supplement 5. Complementation of *gnom<sup>sgt</sup> gnl1* double knockout mutant with *GNOM<sup>3CS</sup>*** Although *GNOM<sup>3CS</sup>* rescues development of the double knockout, giving rise to adult plants (A-C), the rescued double mutants are sterile as indicated by the small siliques without fertilised ovules (D). Col-0, wild-type control. Scale bar, 1 cm.

A

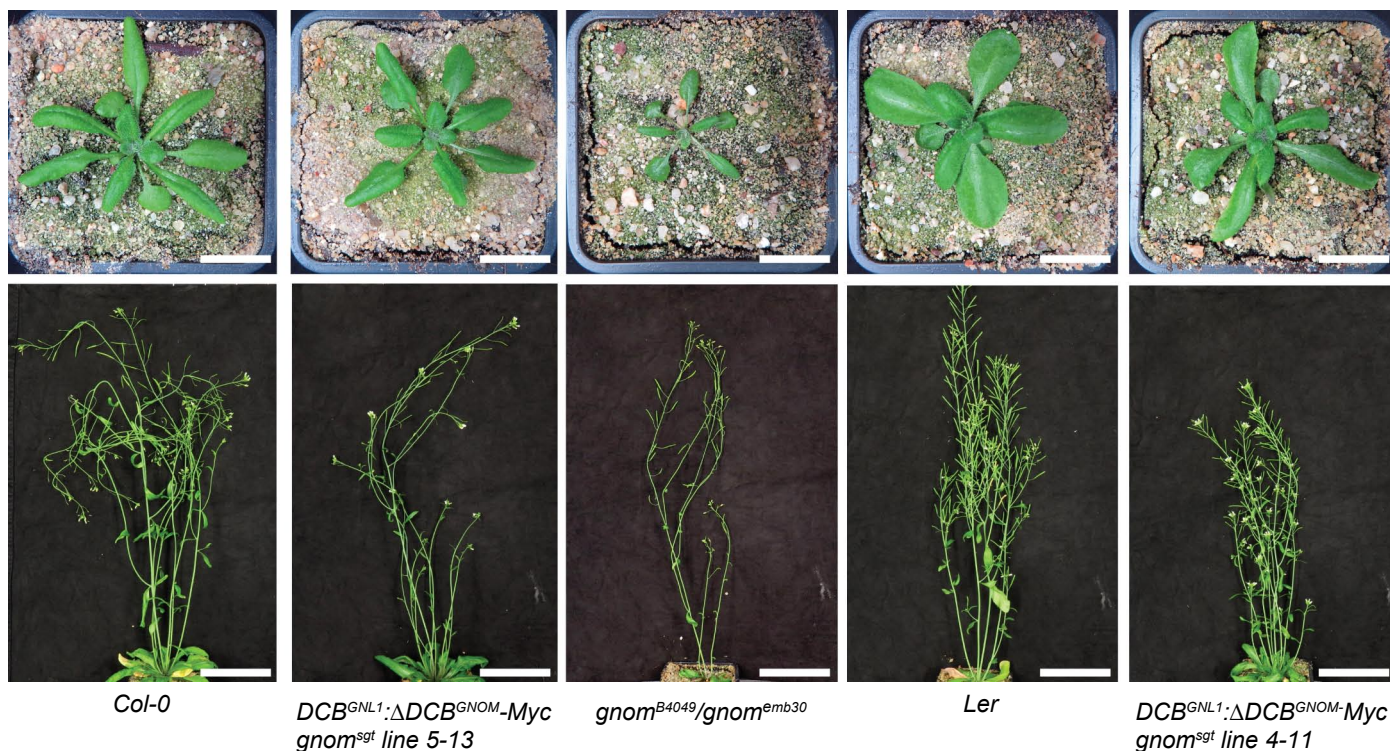

B

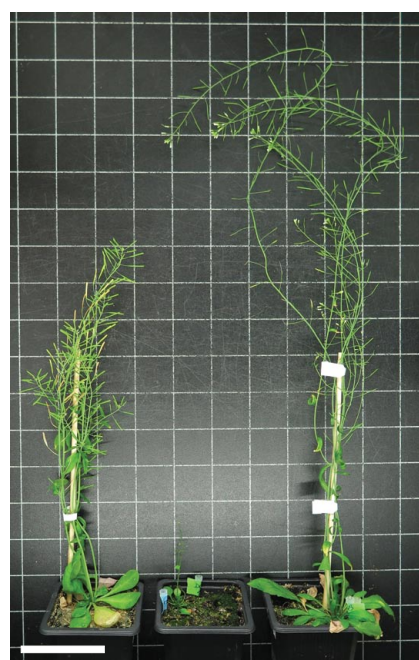

C

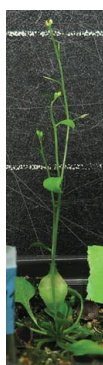

D

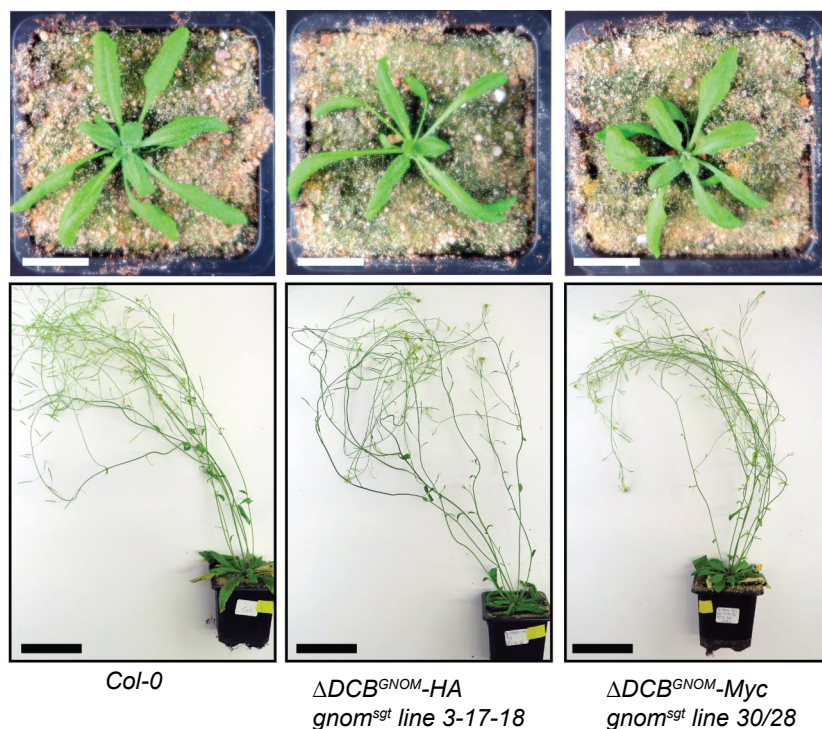

**Figure 3 – figure supplement 1. Postembryonic phenotypes of *gnom<sup>sgt</sup>* deletion mutant and *gnom<sup>sgt</sup> gnl1* double mutant rescued by expression of chimeric DCB<sup>GNL1</sup>:ΔDCB<sup>GNOM</sup> or ΔDCB<sup>GNOM</sup> protein**

(A) Two independent DCB<sup>GNL1</sup>:ΔDCB<sup>GNOM</sup> transgene insertions (#4-11 and #5-13) rescue the *gnom<sup>sgt</sup>* deletion mutant. Top: Three weeks old seedlings. Scale bars, 2 cm. Bottom: Six weeks old plants. Scale bars, 7 cm. Controls: Col-0, wild-type; Ler, wild-type (parental genotype of *gnom<sup>sgt</sup>* deletion mutant); *B4049/emb30*, complementing non-functional *gnom* alleles.

(B, C) Rescue of *gnom<sup>sgt</sup> gnl1* double mutant by expression of Myc-tagged DCB<sup>GNL1</sup>:ΔDCB<sup>GNOM</sup> chimeric protein. Note strongly reduced stature of the rescued double mutant (B, middle; C, at higher magnification) as compared to the rescued *gnom<sup>sgt</sup>* single mutant (B, right). Ler, wild-type control. Scale bar, 7 cm.

(D) Differently tagged ΔDCB<sup>GNOM</sup> transgenes are able to rescue the *gnom<sup>sgt</sup>* deletion mutant. Top: Three weeks old seedlings. Scale bars, 2cm. Bottom: Six weeks old plants. Scale bars, 7 cm. Col-0, wild-type; ΔDCB<sup>GNOM</sup>-HA *gnom<sup>sgt</sup>* and ΔDCB<sup>GNOM</sup>-Myc *gnom<sup>sgt</sup>*, *gnom* deletion mutant expressing HA-tagged or Myc-tagged ΔDCB<sup>GNOM</sup> fragment.

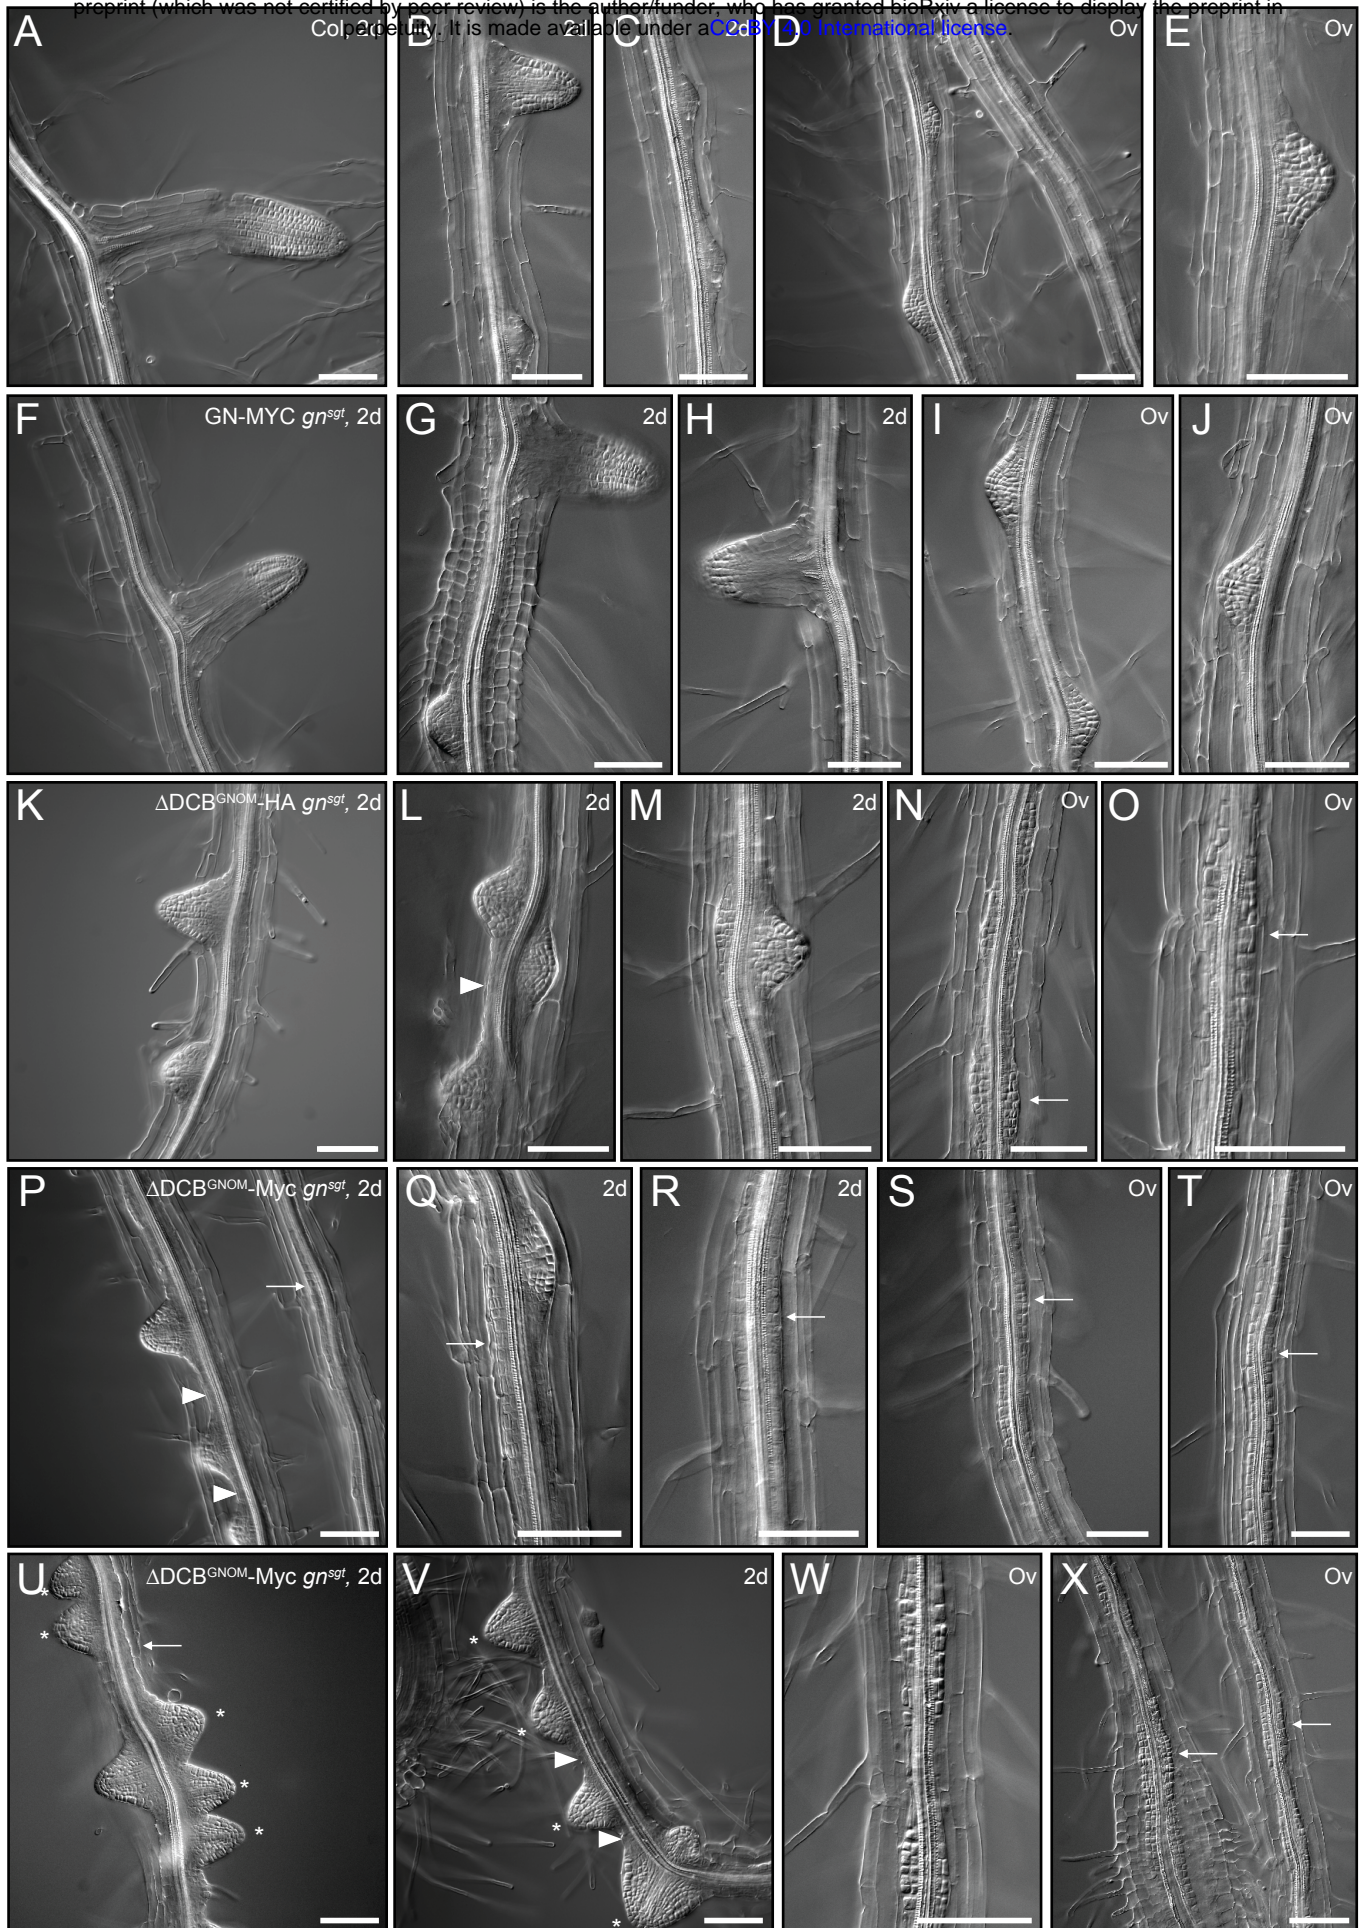

**Figure 3 – figure supplement 2. NAA-induced lateral root initiation in *gnom<sup>sgt</sup>* seedlings rescued by  $\Delta$ DCB<sup>GNOM</sup>**

(A-J) In Columbia wildtype (Col; A-E) and GNOM-Myc *gnom<sup>sgt</sup>* (F-J) controls, lateral root primordia formed after NAA treatment for 2 days (2d; A-C, F-H) or overnight (Ov; D-E, I-J). (K-X) In contrast, loss of the DCB domain in GNOM ( $\Delta$ DCB<sup>GNOM</sup>-HA *gnom<sup>sgt</sup>*, K-O;  $\Delta$ DCB<sup>GNOM</sup>-Myc *gnom<sup>sgt</sup>*, P-X) disturbed lateral root formation. After NAA treatment for 2 days (2d; K-M, P-R, U-V), some lateral root primordia formed, but were abnormally closely spaced (asterisks) and often pericycle cells strongly proliferated between primordia (arrowhead) or along the whole root axis (arrows). Overnight treatment with NAA (Ov; N-O, S-T, W-X) led to strong proliferation of pericycle cells while primordia were rarely detectable (arrows). Scale bar, 100 $\mu$ m.

| <b>(A) Parental cross</b><br><b><i>Col</i> (female) X <i>sgt/sgt gnl1/GNL1</i> with transgene indicated (male)</b> | <b>F1 seedling progeny with paternal alleles (%)</b> |                                                      |                                                                  | <b>Viability score<sup>d</sup></b> |
|--------------------------------------------------------------------------------------------------------------------|------------------------------------------------------|------------------------------------------------------|------------------------------------------------------------------|------------------------------------|
|                                                                                                                    | <b>N<sup>a</sup></b>                                 | <b><i>sgt<sup>b</sup> GNL1</i> (Hyg<sup>S</sup>)</b> | <b><i>sgt<sup>b</sup> gnl1<sup>c</sup></i> (Hyg<sup>R</sup>)</b> |                                    |
| <i>DCB<sup>GNL1</sup>:ΔDCB<sup>GNOM</sup>-Myc</i> (homozygous)                                                     | 369                                                  | 63                                                   | 37                                                               | 0.59                               |
| <i>GNOM-Myc</i> (homozygous)                                                                                       | 307                                                  | 60                                                   | 40                                                               | 0.67                               |
| <i>GNOM<sup>3CS</sup>-YFP</i> (homozygous)                                                                         | 203                                                  | 72                                                   | 28                                                               | 0.39                               |
| <i>GNOM-GFP</i> (homozygous) <sup>e</sup>                                                                          | 542                                                  | 53                                                   | 47                                                               | 0.90                               |
| (values expected for complete rescue)                                                                              |                                                      | 50                                                   | 50                                                               | 1.0                                |
| (values expected for no rescue)                                                                                    |                                                      | 100                                                  | 0                                                                | 0                                  |

  

| <b>(B) Reciprocal parental cross</b><br><b><i>sgt/sgt gnl1/GNL1</i> with transgene indicated (female) X <i>Col</i> (male)</b> | <b>F1 seedling progeny with maternal alleles (%)</b> |                                          |                                          | <b>Viability score<sup>d</sup></b> |
|-------------------------------------------------------------------------------------------------------------------------------|------------------------------------------------------|------------------------------------------|------------------------------------------|------------------------------------|
|                                                                                                                               | <b>N<sup>a</sup></b>                                 | <b><i>sgt GNL1</i> (Hyg<sup>S</sup>)</b> | <b><i>sgt gnl1</i> (Hyg<sup>R</sup>)</b> |                                    |
| <i>DCB<sup>GNL1</sup>:ΔDCB<sup>GNOM</sup>-Myc</i> (homozygous)                                                                | 491                                                  | 51                                       | 49                                       | 0.96                               |
| <i>GNOM-Myc</i> (homozygous)                                                                                                  | 274                                                  | 52                                       | 48                                       | 0.92                               |
| <i>GNOM<sup>3CS</sup>-YFP</i> (homozygous)                                                                                    | 228                                                  | 51                                       | 49                                       | 0.96                               |
| <i>GNOM-GFP</i> (homozygous) <sup>e</sup>                                                                                     | 467                                                  | 51                                       | 49                                       | 0.96                               |
| (values expected for complete rescue)                                                                                         |                                                      | 50                                       | 50                                       | 1.0                                |

**Suppl. Table 1. Rescue of *gnom gnl1* double mutants by *GNOM* transgenes**

F1 seedling progeny from reciprocal crosses of *sgt/sgt gnl1/GNL1* plants bearing the transgenes indicated with wild-type (*Col*) plants were genotyped for the *gnl1* T-DNA allele conferring hygromycin resistance (Hyg<sup>R</sup>) or the hygromycin-sensitive (Hyg<sup>S</sup>) *GNL1* wild-type allele by seed germination of hygromycin-containing agar plates. Myc and HA, protein tags detectable with specific antibodies.

<sup>a</sup> N, number of seedlings genotyped by PCR

<sup>b</sup> *sgt* (*gnom<sup>sgt</sup>*), 37-kb deletion spanning *GNOM* and 4 flanking genes on either side (Brumm et al., 2020)

<sup>c</sup> Transmission of *gnl1* T-DNA allele through pollen reduced by about 40% (Richter et al., 2007)

<sup>d</sup> Transmission of mutant allele divided by transmission of wild-type allele

<sup>e</sup> *GNOM-GFP* protein accumulation at least 10-fold above endogenous *GNOM* level

**(A) Analysis of *gnom<sup>sgt</sup> gnl1* rescuing activity of  $\Delta DCB^{GNOM}$** 

| Parental cross                               | F1 seedling progeny with paternal alleles (%) |                  |                             |                              |                                         |
|----------------------------------------------|-----------------------------------------------|------------------|-----------------------------|------------------------------|-----------------------------------------|
|                                              | N <sup>a</sup>                                | <i>GNOM GNL1</i> | <i>sgt<sup>b</sup> GNL1</i> | <i>GNOM gnl1<sup>c</sup></i> | <i>sgt<sup>b</sup> gnl1<sup>c</sup></i> |
| $\Delta DCB^{GNOM}$ -HA (single copy)        | 238                                           | 38               | 35                          | 27                           | 0                                       |
| (values expected for no rescue) <sup>d</sup> |                                               | 33               | 33                          | 33                           | 0                                       |
| (values expected for rescue) <sup>d</sup>    |                                               | 25               | 25                          | 25                           | 25                                      |

**(B) Analysis of *gnom<sup>sgt</sup>* rescuing activity of  $\Delta DCB^{GNOM-B4049}$** 

| Parental genotype                                                           | Seedling progeny<br>Total (N) | Phenotypes (%) |             |
|-----------------------------------------------------------------------------|-------------------------------|----------------|-------------|
|                                                                             |                               | wild-type      | <i>gnom</i> |
| <i>XLIM-ΔDCB<sup>GNOM-B4049</sup>-Myc (PPT-res) gnom<sup>sgt</sup>/GNOM</i> | 529                           | 80             | 20          |
| (values expected for no rescue) <sup>d</sup>                                |                               | 75             | 25          |
| (values expected for rescue) <sup>d</sup>                                   |                               | 100            | 0           |

**Suppl. Table 2. Rescue analysis of  $\Delta DCB^{GNOM}$  transgene variants**

**(A)** Analysis of  $\Delta DCB^{GNOM}$ -HA *sgt gnl1* mutant gametophyte viability by crossing wild-type (Col) plants with pollen hemizygous for the transgene in the segregating *gnom<sup>sgt</sup> gnl1* double mutant background. By PCR analysis, no mutant seedlings were doubly heterozygous for *gnom<sup>sgt</sup>* and *gnl1*. HA, protein tag detectable with specific antibody.

<sup>a</sup> N, number of seedlings genotyped by PCR

<sup>b</sup> *gnom<sup>sgt</sup>* (*sgt*), 37-kb deletion spanning *GNOM* and 4 flanking genes on either side (Brumm et al., 2020)

<sup>c</sup> Transmission of *gnl1* T-DNA allele through pollen reduced by about 40% (Richter et al., 2007)

<sup>d</sup> Assuming independent segregation

**(B)** PPT-resistant seedling progeny were analysed for wild-type and *gnom* mutant phenotypes on selection plates (PPT, phosphinotricine). *B4049*, G<sub>579</sub>R substitution interfering with DCB- $\Delta DCB$  interaction and membrane association of *GNOM*; *XLIM*, artificial dimerisation module from *Xenopus* (Anders et al., 2008); *Myc*, protein tag detectable with specific antibody.



873 **DATA AVAILABILITY**

874 This manuscript contains Source Data files relating to

875 Figure 1

876 Figure 1 – Figure Supplement 1

877 Figure 2

878 Figure 2 – Figure Supplement 1

879 Figure 2 – Figure Supplement 4

880 Figure 3

881 Figure 4
